# Supplementary material
Source: publisher figshare collection journal article supplement (https://acs.figshare.com/ndownloader/files/3707731)
Supplement: Supplementary file 1 [file 3707731]

# **Bioactive Iridoid Glycosides from the Whole Plants of *Rehmannia chingii***

Yan-Fei Liu, Guo-Ru Shi, Xin Wang, Chun-Lei Zhang, Yan Wang, Ruo-Yun Chen,  
and De-Quan Yu\*

*State Key Laboratory of Bioactive Substance and Function of Natural Medicines,  
Institute of Materia Medica, Chinese Academy of Medical Sciences and Peking Union  
Medical College, Beijing 100050, People's Republic of China*

## **Supporting Information**

## List of Supporting Information

- S1. IR Spectrum of compound **1**
- S2.  $^1\text{H}$  NMR Spectrum of compound **1** (600MHz, Methanol- $d_4$ )
- S3.  $^{13}\text{C}$  NMR Spectrum of compound **1** (150 MHz, Methanol- $d_4$ )
- S4.  $^1\text{H}$ - $^1\text{H}$  COSY Spectrum of compound **1**
- S5. HSQC Spectrum of compound **1**
- S6. HMBC Spectrum of compound **1**
- S7. NOESY Spectrum of compound **1**
- S8. HRESIMS Spectrum of compound **1**
- S9. CD Spectrum of compound **1** ( $\text{CH}_3\text{OH}$ )
- S10. IR Spectrum of compound **2**
- S11.  $^1\text{H}$  NMR Spectrum of compound **2** (600MHz, Methanol- $d_4$ )
- S12.  $^{13}\text{C}$  NMR Spectrum of compound **2** (150 MHz, Methanol- $d_4$ )
- S13.  $^1\text{H}$ - $^1\text{H}$  COSY Spectrum of compound **2**
- S14. HSQC Spectrum of compound **2**
- S15. HMBC Spectrum of compound **2**
- S16. ROESY Spectrum of compound **2**
- S17. HRESIMS Spectrum of compound **2**
- S18. CD Spectrum of compound **2** ( $\text{CH}_3\text{OH}$ )
- S19. IR Spectrum of compound **3**
- S20.  $^1\text{H}$  NMR Spectrum of compound **3** (500MHz, Methanol- $d_4$ )
- S21.  $^{13}\text{C}$  NMR Spectrum of compound **3** (125 MHz, Methanol- $d_4$ )
- S22.  $^1\text{H}$ - $^1\text{H}$  COSY Spectrum of compound **3**
- S23. HSQC Spectrum of compound **3**
- S24. HMBC Spectrum of compound **3**
- S25. ROESY Spectrum of compound **3**
- S26. HRESIMS Spectrum of compound **3**
- S27. CD Spectrum of compound **3** ( $\text{CH}_3\text{OH}$ )
- S28. IR Spectrum of compound **4**
- S29.  $^1\text{H}$  NMR Spectrum of compound **4** (500 MHz, Methanol- $d_4$ )
- S30.  $^{13}\text{C}$  NMR Spectrum of compound **4** (125 MHz, Methanol- $d_4$ )
- S31.  $^1\text{H}$ - $^1\text{H}$  COSY Spectrum of compound **4**
- S32. HSQC Spectrum of compound **4**
- S33. HMBC Spectrum of compound **4**
- S34. ROESY Spectrum of compound **4**
- S35. HRESIMS Spectrum of compound **4**
- S36. CD Spectrum of compound **4** ( $\text{CH}_3\text{OH}$ )
- S37. IR Spectrum of compound **5**
- S38.  $^1\text{H}$  NMR Spectrum of compound **5** (600MHz, Methanol- $d_4$ )
- S39.  $^{13}\text{C}$  NMR Spectrum of compound **5** (150 MHz, Methanol- $d_4$ )
- S40.  $^1\text{H}$ - $^1\text{H}$  COSY Spectrum of compound **5**
- S41. HSQC Spectrum of compound **5**
- S42. HMBC Spectrum of compound **5**

S43. ROESY Spectrum of compound **5**  
 S44. HRESIMS Spectrum of compound **5**  
 S45. CD Spectrum of compound **5** (CH<sub>3</sub>OH)  
 S46. IR Spectrum of compound **6**  
 S47. <sup>1</sup>H NMR Spectrum of compound **6** (600MHz, Methanol-*d*<sub>4</sub>)  
 S48. <sup>13</sup>C NMR Spectrum of compound **6** (150 MHz, Methanol-*d*<sub>4</sub>)  
 S49. <sup>1</sup>H–<sup>1</sup>H COSY Spectrum of compound **6**  
 S50. HSQC Spectrum of compound **6**  
 S51. HMBC Spectrum of compound **6**  
 S52. NOESY Spectrum of compound **6**  
 S53. HRESIMS Spectrum of compound **6**  
 S54. CD Spectrum of compound **6** (CH<sub>3</sub>OH)  
 S55. IR Spectrum of compound **7**  
 S56. <sup>1</sup>H NMR Spectrum of compound **7** (500MHz, Methanol-*d*<sub>4</sub>)  
 S57. <sup>13</sup>C NMR Spectrum of compound **7** (125 MHz, Methanol-*d*<sub>4</sub>)  
 S58. <sup>1</sup>H–<sup>1</sup>H COSY Spectrum of compound **7**  
 S59. HSQC Spectrum of compound **7**  
 S60. HMBC Spectrum of compound **7**  
 S61. ROESY Spectrum of compound **7**  
 S62. HRESIMS Spectrum of compound **7**  
 S63. CD Spectrum of compound **7** (CH<sub>3</sub>OH)  
 S64. IR Spectrum of compound **8**  
 S65. <sup>1</sup>H NMR Spectrum of compound **8** (500MHz, Methanol-*d*<sub>4</sub>)  
 S66. <sup>13</sup>C NMR spectrum of compound **8** (125 MHz, Methanol-*d*<sub>4</sub>)  
 S67. <sup>1</sup>H–<sup>1</sup>H COSY Spectrum of compound **8**  
 S68. HSQC Spectrum of compound **8**  
 S69. HMBC Spectrum of compound **8**  
 S70. ROESY Spectrum of compound **8**  
 S71. HRESIMS Spectrum of compound **8**  
 S72. CD Spectrum of compound **8** (CH<sub>3</sub>OH)  
 S73. IR Spectrum of compound **9**  
 S74. <sup>1</sup>H NMR Spectrum of compound **9** (500MHz, Methanol-*d*<sub>4</sub>)  
 S75. <sup>13</sup>C NMR Spectrum of compound **9** (125 MHz, Methanol-*d*<sub>4</sub>)  
 S76. <sup>1</sup>H–<sup>1</sup>H COSY Spectrum of compound **9**  
 S77. HSQC Spectrum of compound **9**  
 S78. HMBC Spectrum of compound **9**  
 S79. ROESY Spectrum of compound **9**  
 S80. HRESIMS Spectrum of compound **9**  
 S81. CD Spectrum of compound **9** (CH<sub>3</sub>OH)

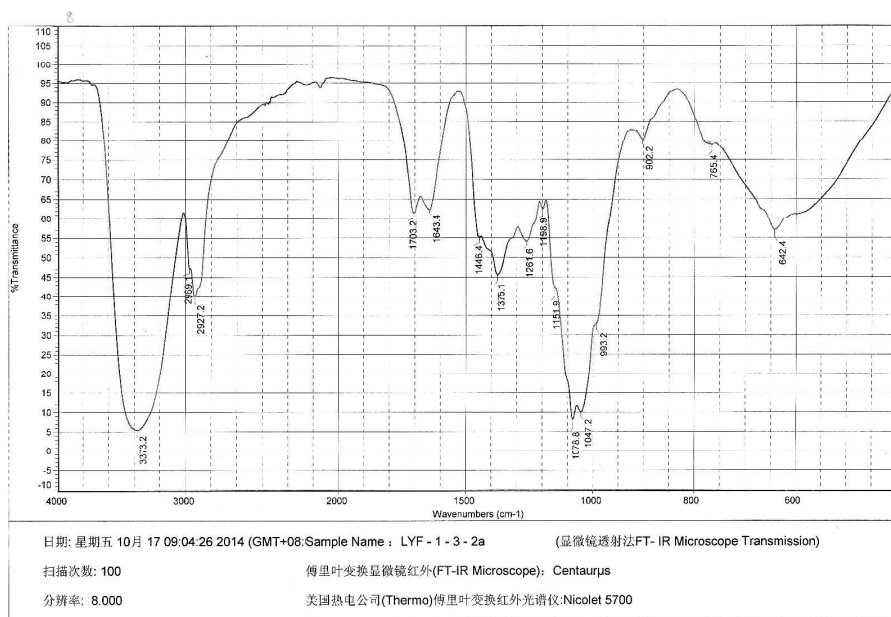

S1. IR Spectrum of compound 1

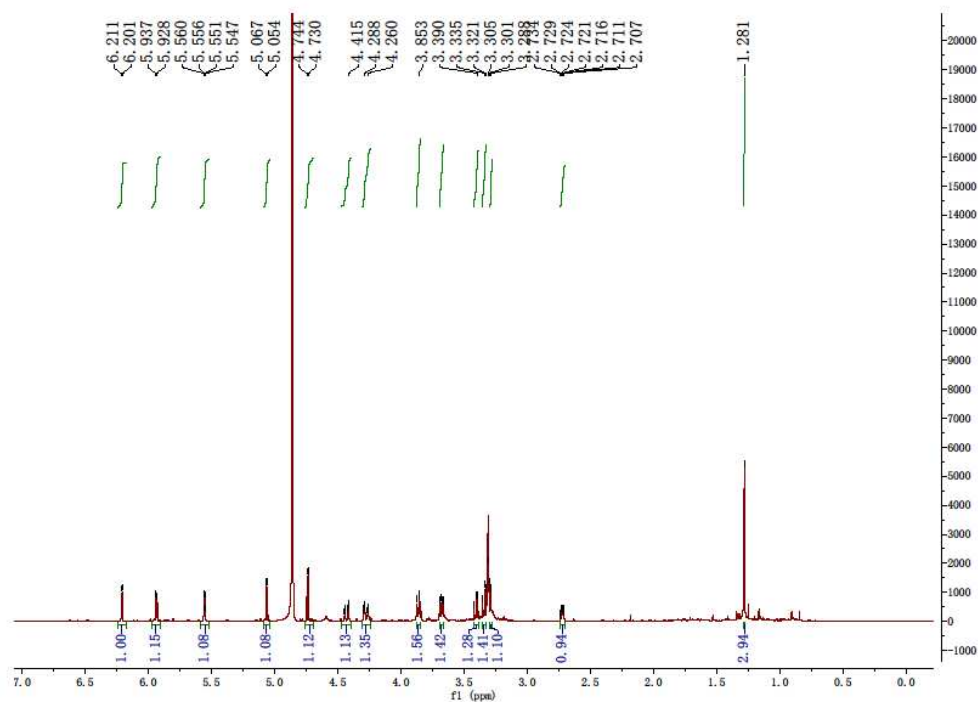

S2. <sup>1</sup>H NMR Spectrum of compound 1 (600MHz, Methanol-d<sub>4</sub>)

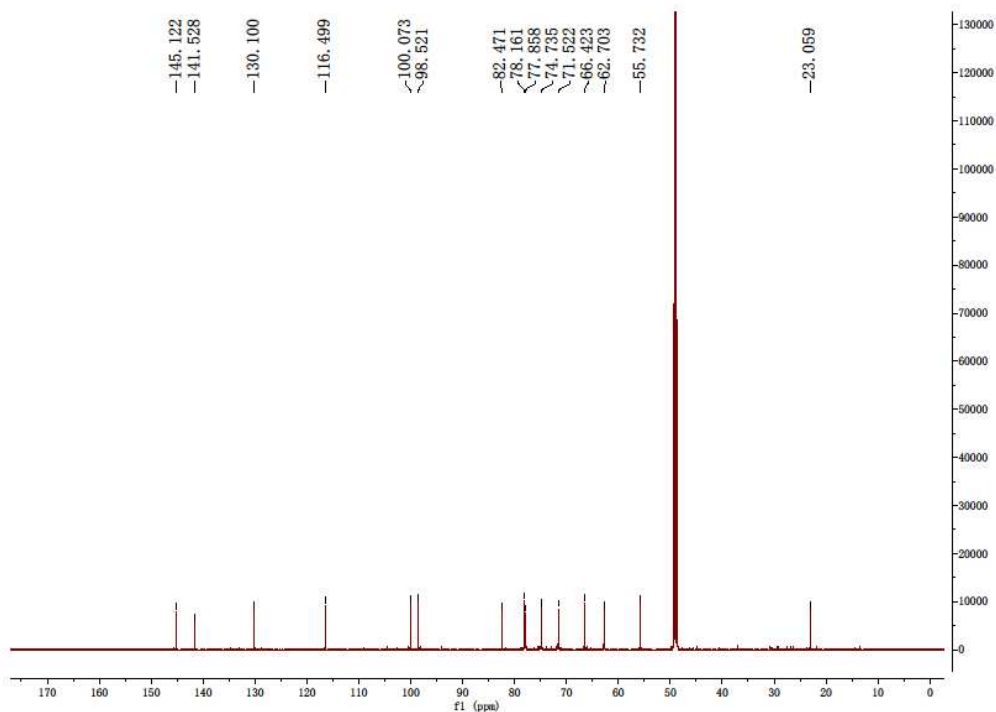

S3.  $^{13}\text{C}$  NMR Spectrum of compound **1** (150 MHz, Methanol- $d_4$ )

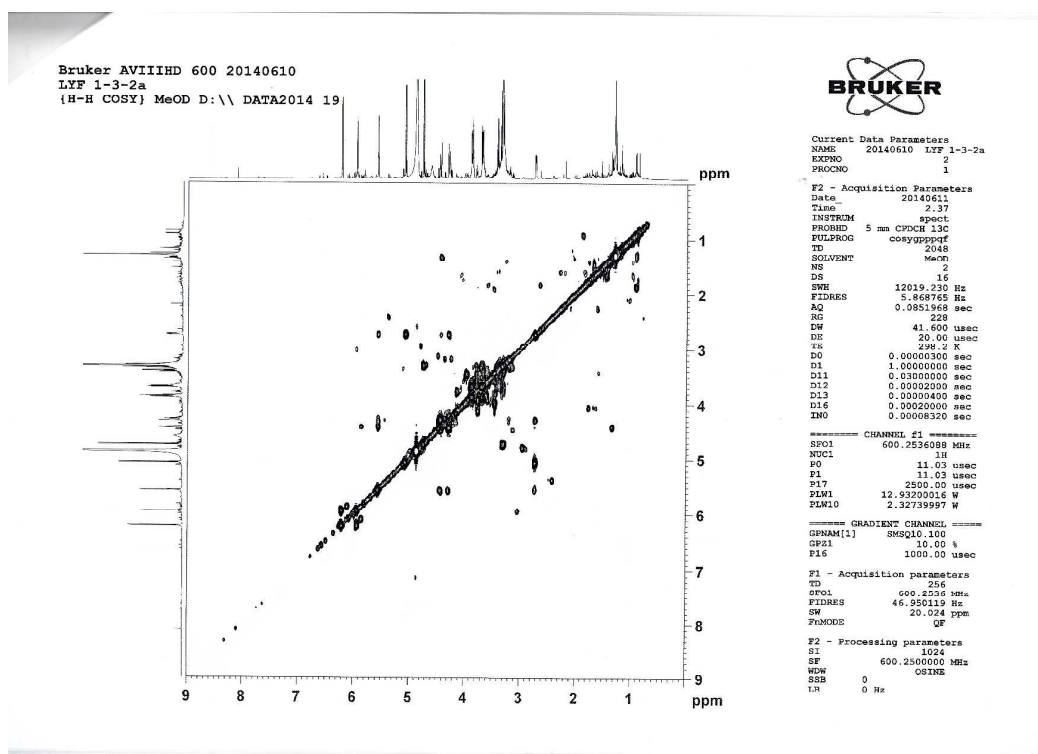

S4.  $^1\text{H}$ - $^1\text{H}$  COSY Spectrum of compound **1**

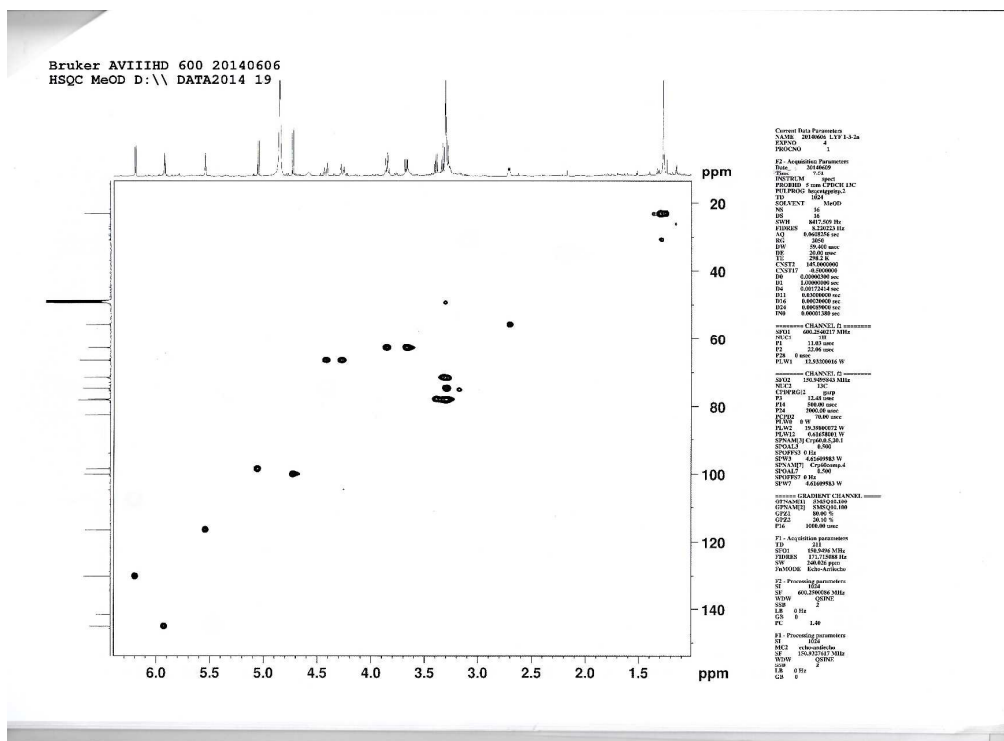

S5. HSQC Spectrum of compound 1

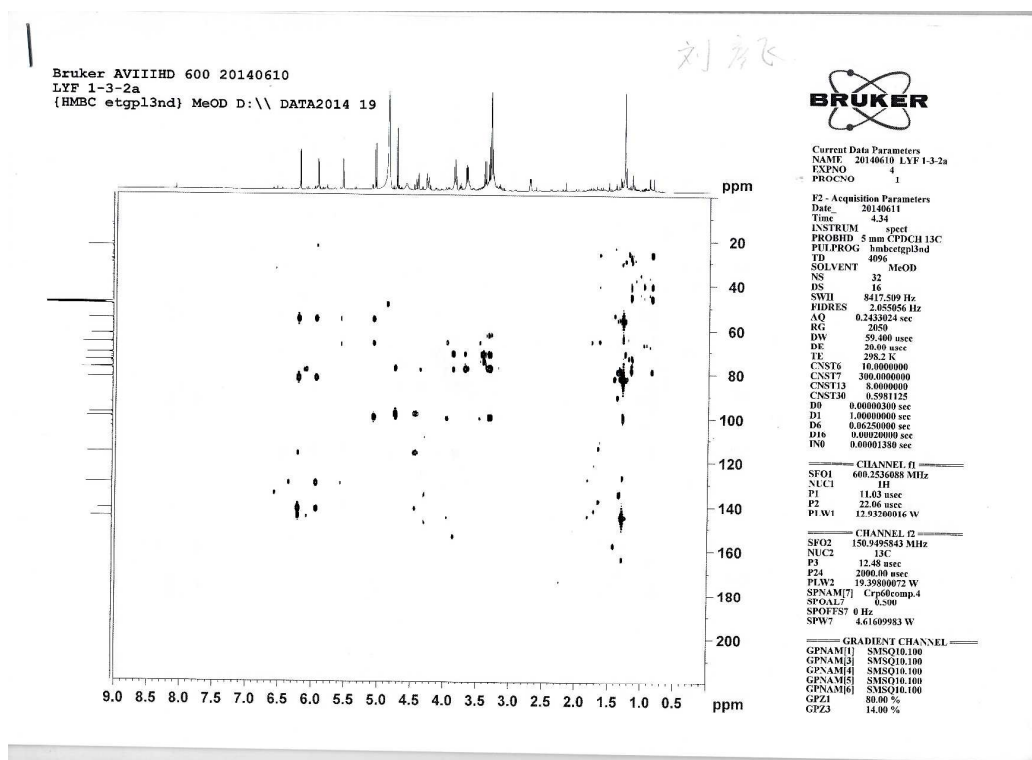

S6. HMBC Spectrum of compound 1

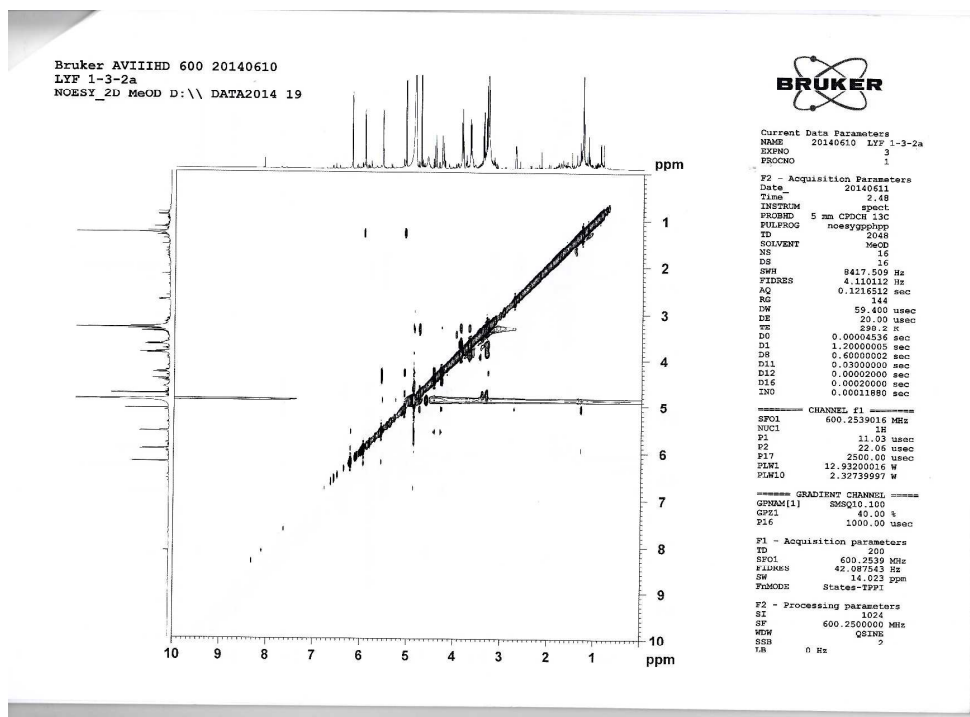

S7. NOESY Spectrum of compound 1

MS Formula Results: + Scan (4.170 min) Sub (2014090903.d)

| MS       | Ion                | Formula                                          | Abundance |
|----------|--------------------|--------------------------------------------------|-----------|
| 353.1211 | [M+H] <sup>+</sup> | C <sub>15</sub> H <sub>22</sub> N <sub>2</sub> O | 100.00    |

  

| Best | Formula (M)                       | Ion Formula                                      | Score | Cross Score | Mass     | Calc Mass | Calc mp  | Diff (ppm) | Abs Diff (ppm) | Mass Match | Abund Match | Spiking Match | DBE |
|------|-----------------------------------|--------------------------------------------------|-------|-------------|----------|-----------|----------|------------|----------------|------------|-------------|---------------|-----|
| ✓    | C <sub>15</sub> H <sub>22</sub> O | C <sub>15</sub> H <sub>22</sub> N <sub>2</sub> O | 99.93 |             | 330.1318 | 330.1315  | 353.1207 | -1.34      | 1.34           | 99.96      | 99.99       | 99.99         | 5   |

S8. HRESIMS Spectrum of compound 1

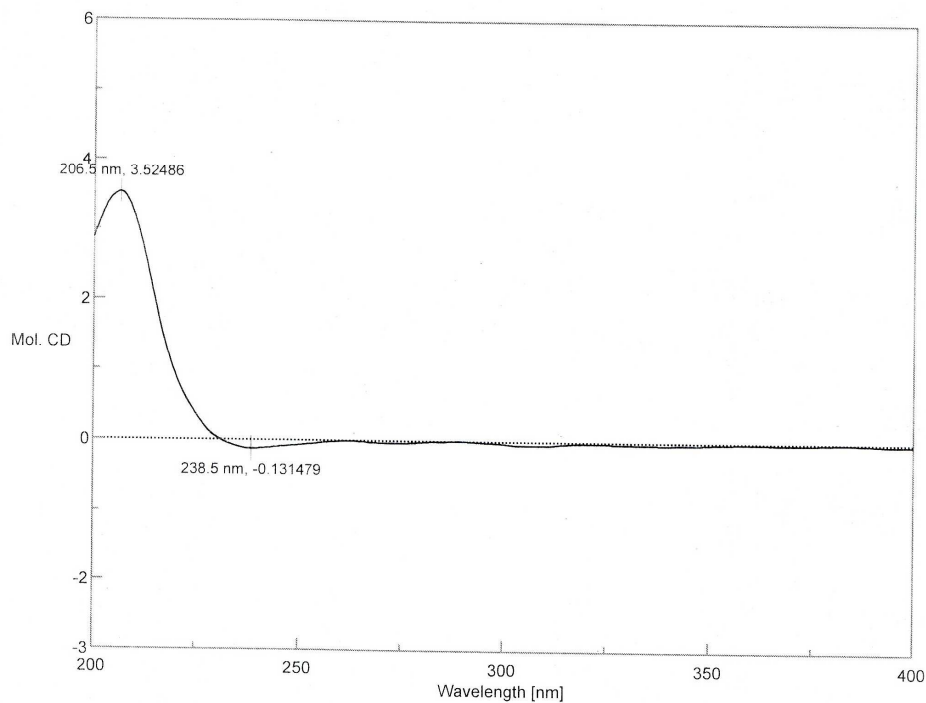

### S9. CD Spectrum of compound 1 (CH<sub>3</sub>OH)

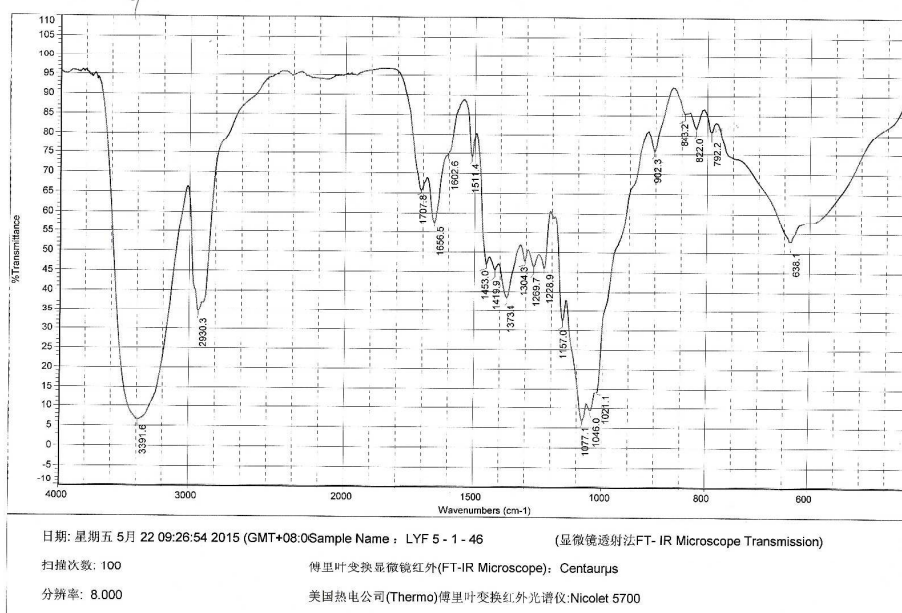

### S10. IR Spectrum of compound 2

Bruker AVIIHHD 600 20150109  
PROTON CD3OD D:\DATA2015 44

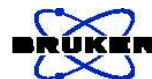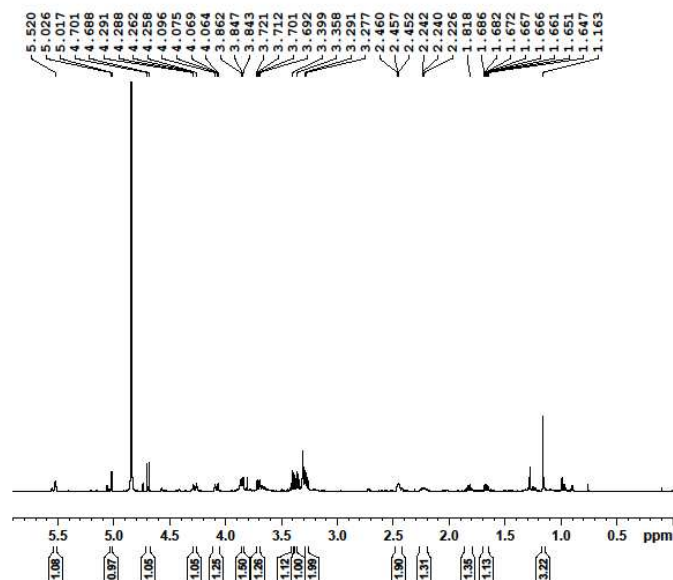

```

NAME      20150109 LYF 5-1-4b
EXPNO     1
PROCNO    1
Date_     20150111
Time      12.48
INSTRUM    spect
PROBHD     5 mm CPDCH 13C
PULPROG    zg30
TD         65536
SOLVENT    CD3OD
NS         16
DS         2
SWH         12019.230 Hz
FIDRES     0.183399 Hz
AQ         2.7263477 sec
RG         32
DW         41.600 usec
DE         20.00 usec
TE         298.2 K
D1         1.00000000 sec
TD0        1

===== CHANNEL f1 =====
SFO1       600.2537068 MHz
NUC1        1H
P1         11.50 usec
SI         65536
SF         600.2499811 MHz
WDW         EM
SSB         0
LB         0.30 Hz
GB         0
PC         1.00
    
```

### S11. <sup>1</sup>H NMR Spectrum of compound 2 (600 MHz, Methanol-d<sub>4</sub>)



Bruker AVIIIHD 600 20150105  
C13 CD3OD D:\ DATA2015 10

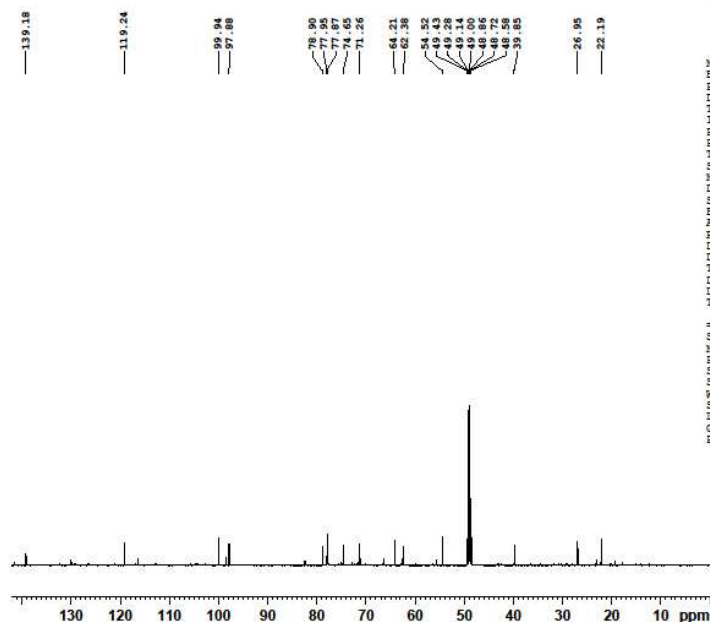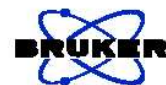

```

NAME      20150109  LVF 5-1-4b
EXPNO     1
PROCNO    1
Date_     20150106
Time      12.12
INSTRUM    spect
PROBHD     5 mm CPDCH 13C
PULPROG    zgpg30
TD         65536
SOLVENT    CD3OD
NS         555
DS         4
SWH        26087.691 Hz
FIDRES     0.580197 Hz
AQ         0.9088159 sec
RG         2050
DW         19.867 usec
DE         31.37 usec
TE         298.2 K
D1         1.00000000 sec
D11        0.03000000 sec
TD0        250

===== CHANNEL f1 =====
SF01      150.9495842 MHz
NUC1       13C
P1         12.94 usec
SI         32768
SF         150.9327700 MHz
WDW        EM
SSB        0
LB         1.00 Hz
GB         0
PC         1.40

```

S12.  $^{13}\text{C}$  NMR Spectrum of compound **2** (150 MHz, Methanol- $d_4$ )

Bruker AVIIIHD 600 20150109  
COSY\_MQF CD3OD D:\ DATA2015 44

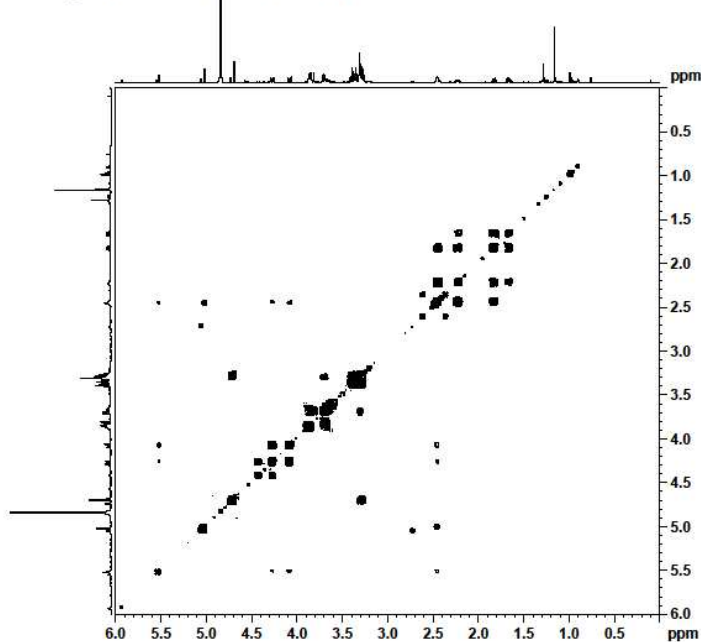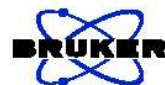

```

NAME      20150109  LVF 5-1-4b
EXPNO     2
PROCNO    1
Date_     20150111
Time      12.49
INSTRUM    spect
PROBHD     5 mm CPDCH 13C
PULPROG    cosygmqf
TD         2048
SOLVENT    CD3OD
NS         16
DS         4
SWH        8417.509 Hz
FIDRES     4.110112 Hz
AQ         0.1217012 sec
RG         2050
DW         59.400 usec
DE         20.00 usec
TE         298.2 K
D0         0.00003000 sec
D1         2.00000000 sec
D13        0.00000400 sec
D16        0.00020000 sec
D19        0.00019000 sec
TD0        100

===== CHANNEL f1 =====
SF01      600.2540217 MHz
NUC1       1H
P1         11.50 usec
WDW        1
SI         1024
SF         600.2499779 MHz
WDW        SINE
SSB        0
LB         0.00 Hz
GB         0
PC         1.40
SI         1024
SF         600.2499870 MHz
WDW        SINE
SSB        0
LB         0.00 Hz
GB         0

```

S13.  $^1\text{H}$ - $^1\text{H}$  COSY Spectrum of compound **2**

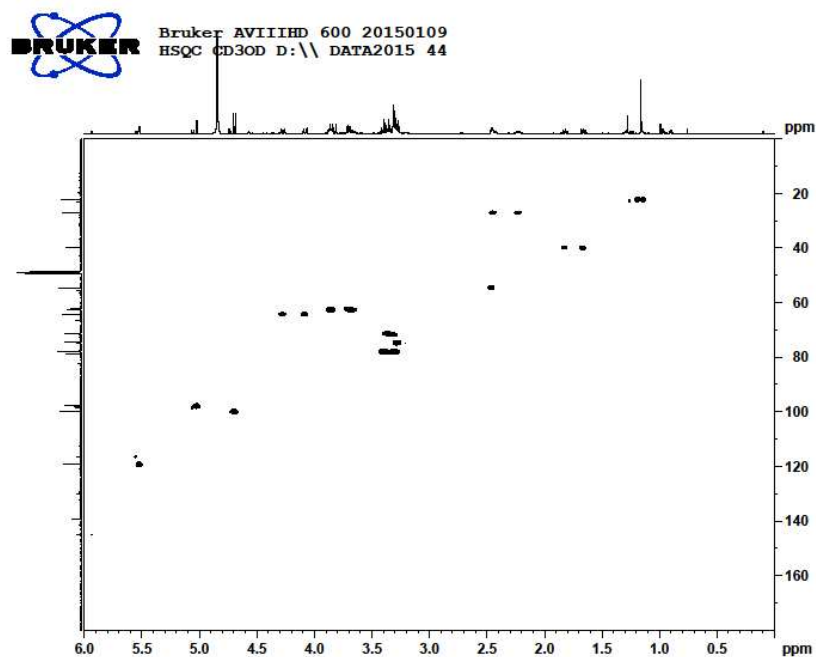

S14. HSQC Spectrum of compound 2

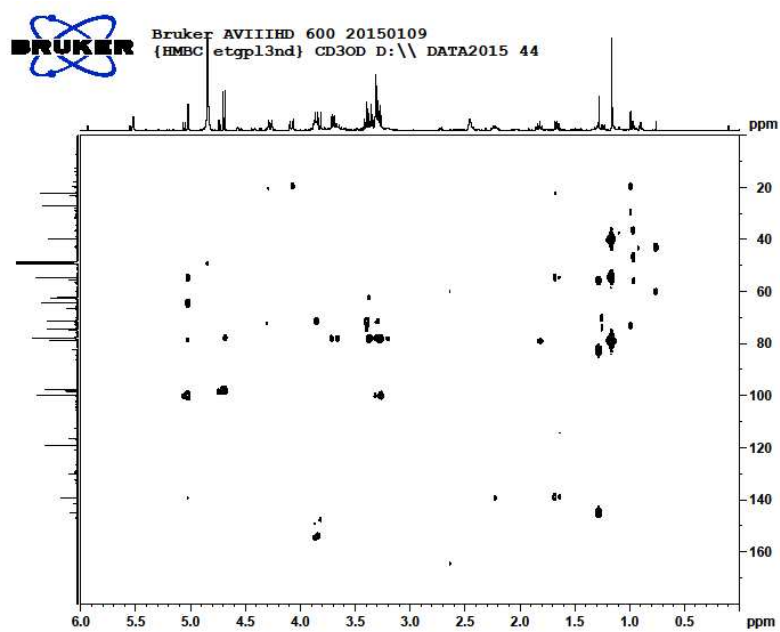

S15. HMBC Spectrum of compound 2

Bruker AVIIHD 600 20150109  
ROESY CD3OD D:\DATA2015 44

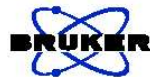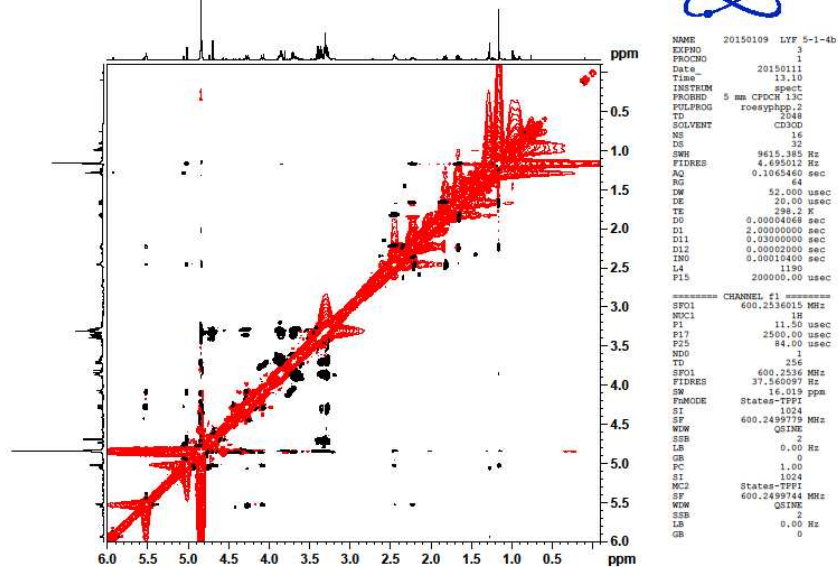

S16. ROESY Spectrum of compound 2

MS Formula Results: + Scan (4.457 min) Sub (2015012103.d)

| m/z     | Ion                 | Formula          | Abundance |
|---------|---------------------|------------------|-----------|
| 355.136 | (M+Na) <sup>+</sup> | C15 H24 Na O8    | 2087076   |
| Best    | Formula (M)         | Ion Formula      | Score     |
| +       | C15 H24 O8          | C16 H24 Na O8    | 99.96     |
| -       | C16 H28 O3 S2       | C16 H28 Na O3 S2 | 97.24     |

| Mass     | Calc Mass | Calc m/z | Diff (ppm) | Abn Diff (ppm) | Mass Match | Abund Match | Spacing Match | DRE |
|----------|-----------|----------|------------|----------------|------------|-------------|---------------|-----|
| 332.1467 | 332.1481  | 335.1363 | -1.12      | 1.12           | 99.96      | 99.99       | 99.93         | 4   |
| 332.1467 | 332.1481  | 355.1372 | -3.73      | 3.73           | 98.61      | 91.61       | 99.27         | 3   |

S17. HRESIMS Spectrum of compound 2

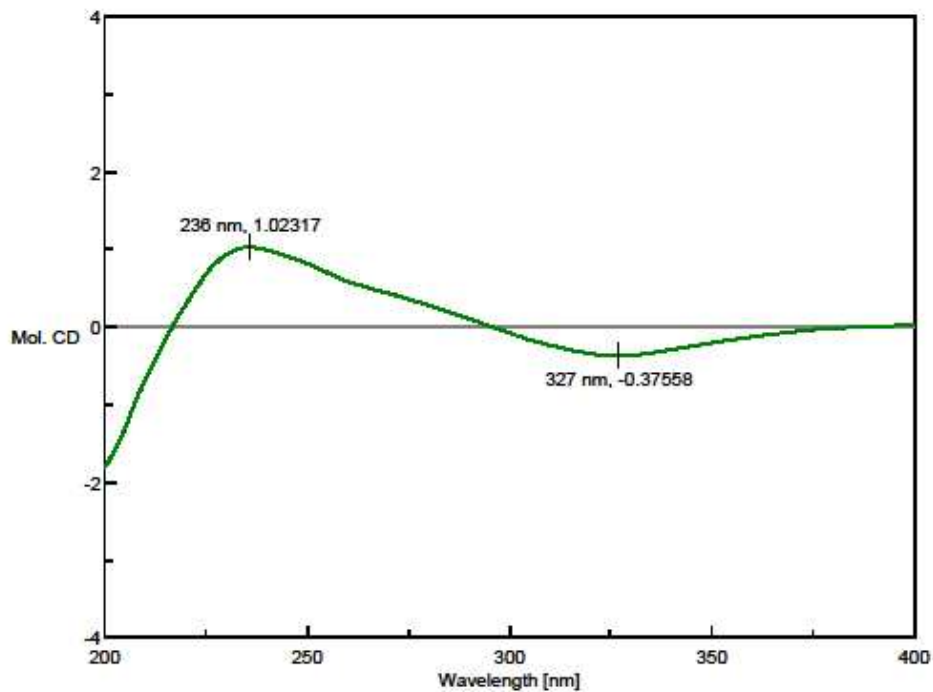

S18. CD Spectrum of compound 2 (CH<sub>3</sub>OH)

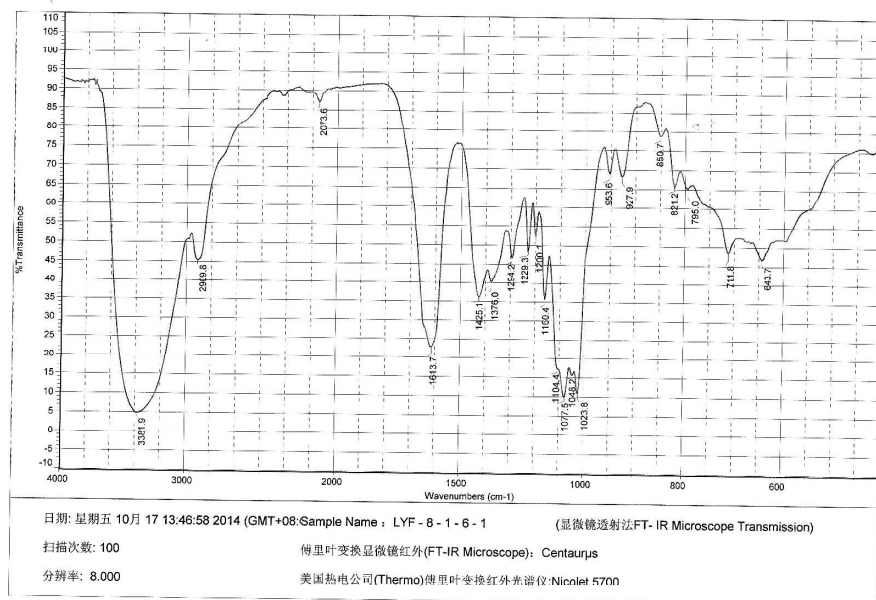

S19. IR Spectrum of compound 3

BRUKER AV-III-500 1H-NMR LYF 8-1-6-1 IN MeOD 2014.02.25

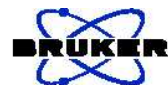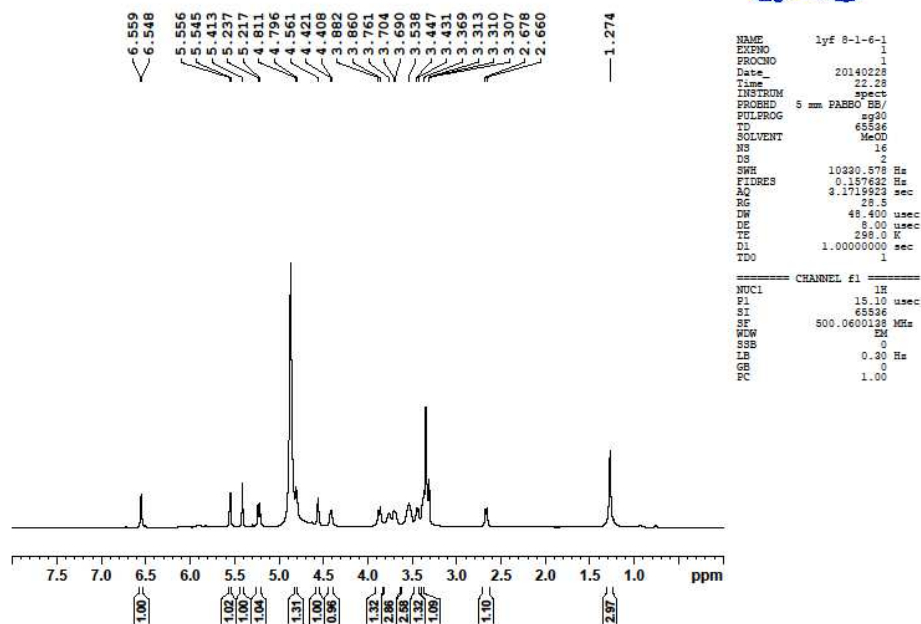

S20.  $^1\text{H}$  NMR Spectrum of compound 3 (500MHz, Methanol- $d_4$ )

BRUKER AV-III-500 13C-NMR LYF 8-1-6-1 IN MeOD 2014.02.13

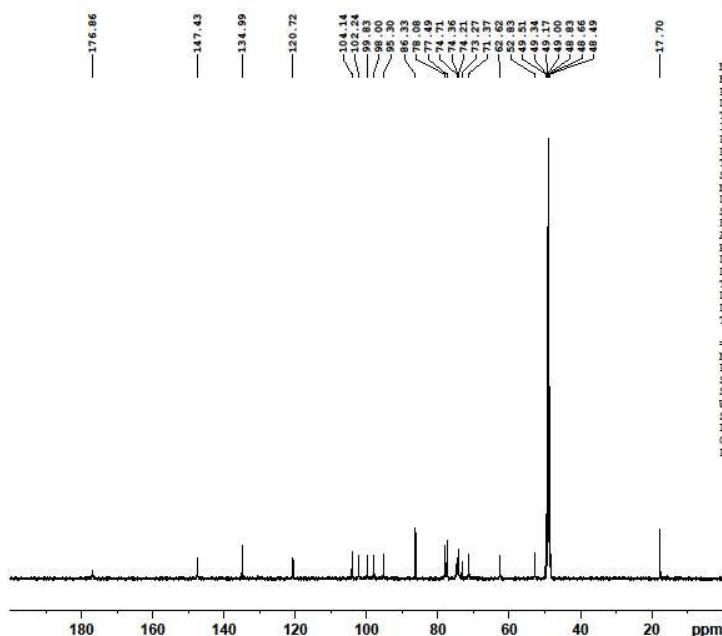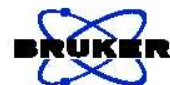

```

NAME      lyf 8-1-6-1
EXPNO     6
PROCNO    1
Date_     20140214
Time      13.58
INSTRUM    spect
PROBHD     5 mm PABBO BB/
PULPROG    zgpg30
TD         65536
SOLVENT    MeOD
NS         1166
DS         4
SWH        29761.904 Hz
FIDRES     0.454131 Hz
AQ         1.1010548 sec
RG         203
DW         16.800 usec
DE         6.50 usec
TE         298.5 K
D1         1.00000000 sec
D11        0.03000000 sec
TDO        800

===== CHANNEL f1 =====
NUC1       13C
P1         10.00 usec
SI         22768
SF         125.7400308 MHz
WDW        EM
SSB        0
LB         1.00 Hz
GB         0
PC         1.40
  
```

S21.  $^{13}\text{C}$  NMR Spectrum of compound **3** (125 MHz, Methanol- $d_4$ )

BRUKER AV-III-500 COSY-NMR LYF 8-1-6-1 IN MeOD 2014.02.25

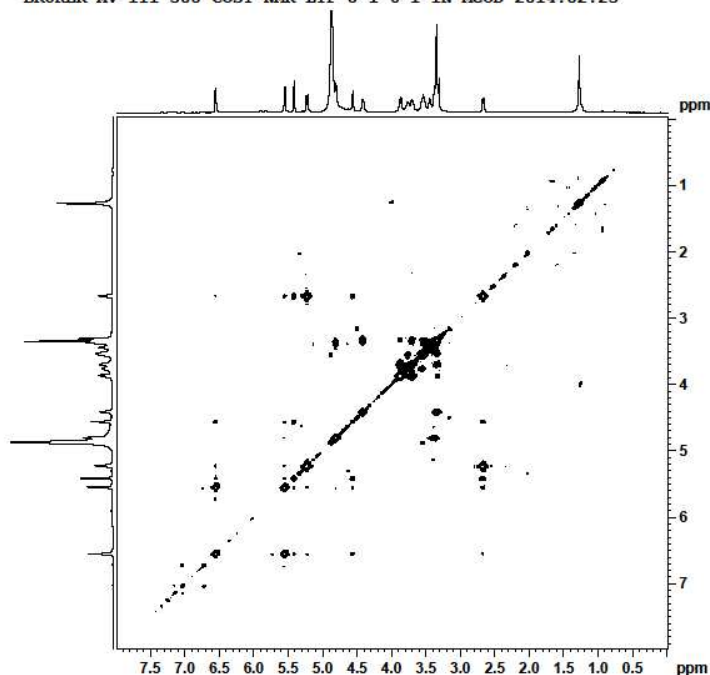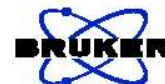

```

NAME      lyf 8-1-6-1
EXPNO     2
PROCNO    1
Date_     20140228
Time      22.29
INSTRUM    spect
PROBHD     5 mm PABBO BB/
PULPROG    cosyzgpg30
TD         2048
SOLVENT    MeOD
NS         2
DS         8
SWH        4000.000 Hz
FIDRES     1.953125 Hz
AQ         0.2560500 sec
RG         203
DW         125.000 usec
DE         8.00 usec
TE         297.9 K
D0         0.00003000 sec
D1         1.00000000 sec
D12        0.00004000 sec
D16        0.00020000 sec
TNO        0.00024995 sec

===== CHANNEL f1 =====
NUC1       1H
P1         15.10 usec
WDW        1
SF         500.062 MHz
FIDRES     15.626941 Hz
SW         8.000 ppm
F2MODE     QF
SI         1024
SF         500.0600116 MHz
WDW        SINE
SSB        0
LB         0.00 Hz
GB         0
PC         1.40
SI         1024
MC2        500.0600121 MHz
WDW        SINE
SSB        0
LB         0.00 Hz
GB         0
  
```

S22.  $^1\text{H}$ - $^1\text{H}$  COSY Spectrum of compound **3**

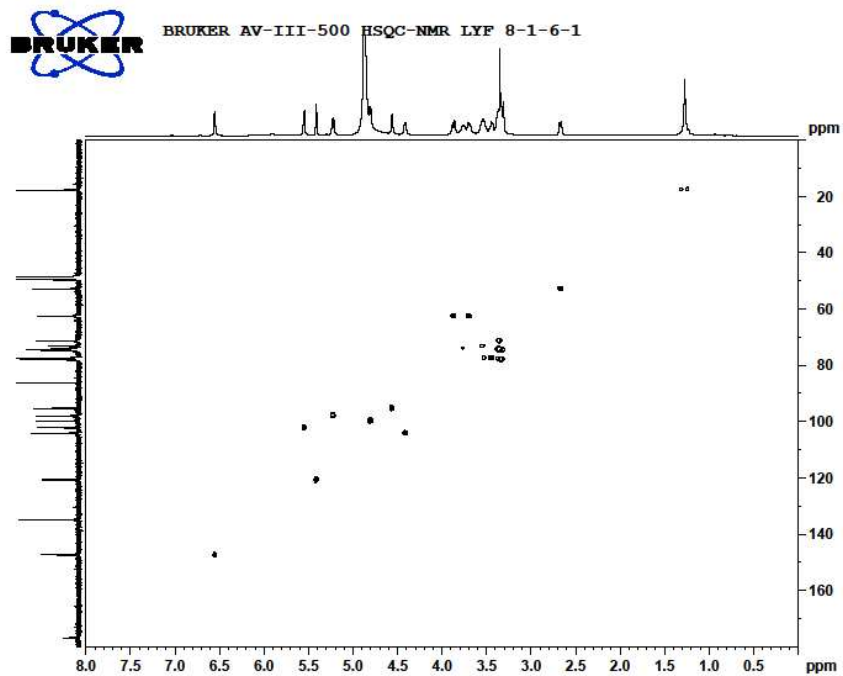

S23. HSQC Spectrum of compound **3**

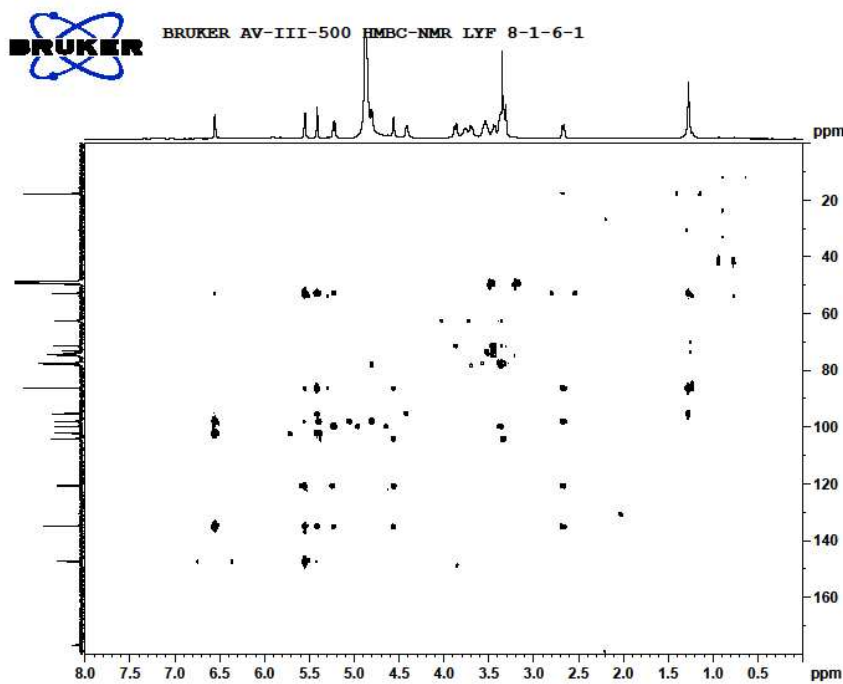

S24. HMBC Spectrum of compound **3**

BRUKER AV-III-500 ROESY-NMR LYF 8-1-6-1 IN MeOD 2014.02.25

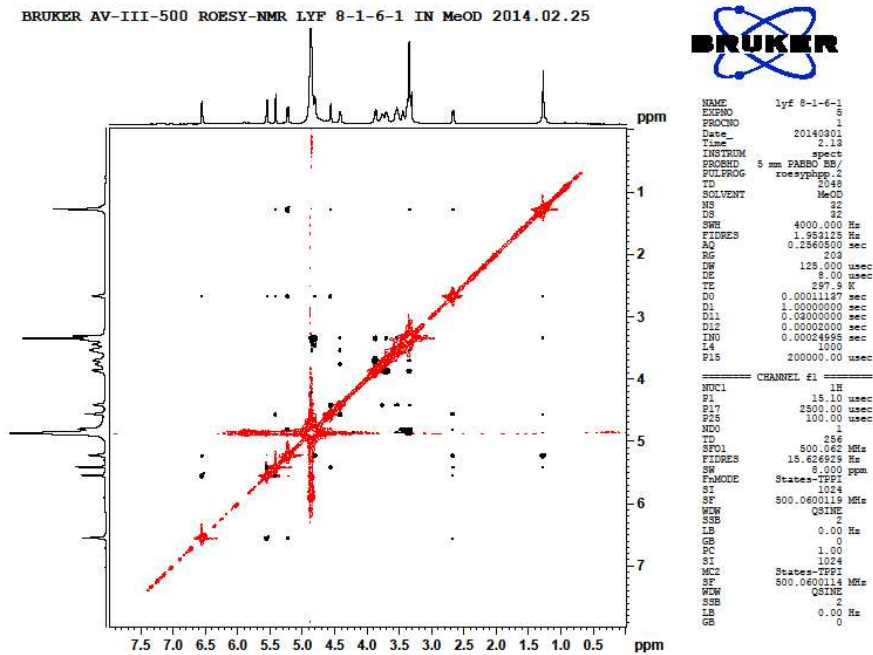

S25. ROESY Spectrum of compound 3

MS Formula Results: + Scan (2.783 min) Sub (2014090906.d)

| m/z         | Ion                 | Formula     | Abundance   |
|-------------|---------------------|-------------|-------------|
| 255.140     | (M+Na) <sup>+</sup> | C21H30NaO16 | 48651.4     |
| Best        |                     |             |             |
| Formula (g) | Ion Formula         | Score       | Order Score |
| C21H30O16   | C21H30NaO16         | 99.94       |             |
| C34H22N2O4  | C34H22N2NaO4        | 95.95       |             |

| Mass     | Calc Mass | Calc m/z | Diff (gsm) | Abs Diff (ppm) | Mass Match | Abund Match | Spacing Match | DSE |
|----------|-----------|----------|------------|----------------|------------|-------------|---------------|-----|
| 522.1588 | 522.1585  | 545.1477 | -0.58      | 0.58           | 99.99      | 99.96       |               | 7   |
| 522.1588 | 522.158   | 545.1472 | -1.56      | 1.56           | 99.92      | 99.78       | 99.77         | 25  |

S26. HRESIMS Spectrum of compound 3

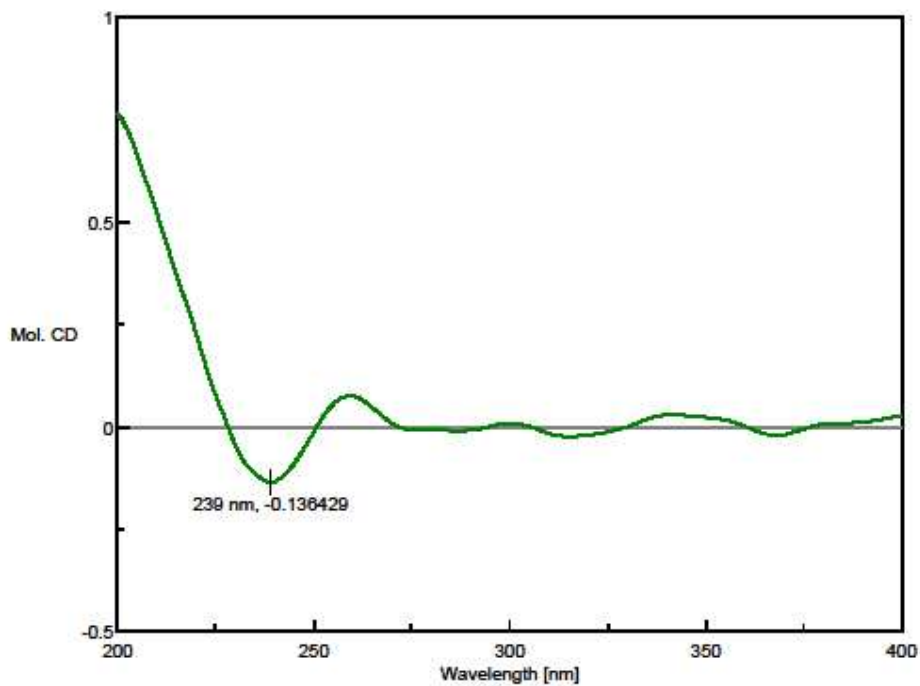

S27. CD Spectrum of compound 3 (CH<sub>3</sub>OH)



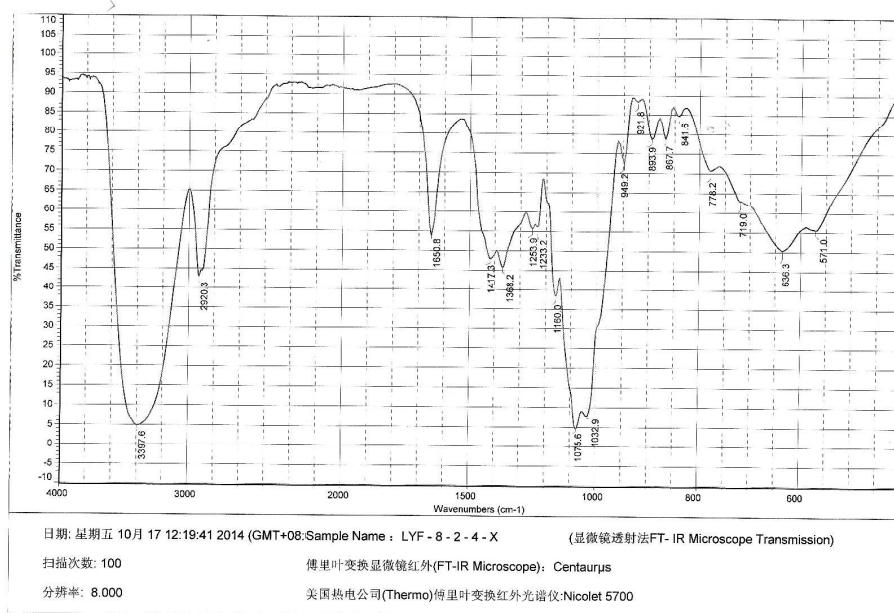

## S28. IR Spectrum of compound 4

BRUKER AV-III-500 1H-NMR LYF 8-2-4-X IN MeOD 2014.02.20

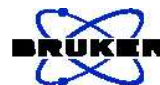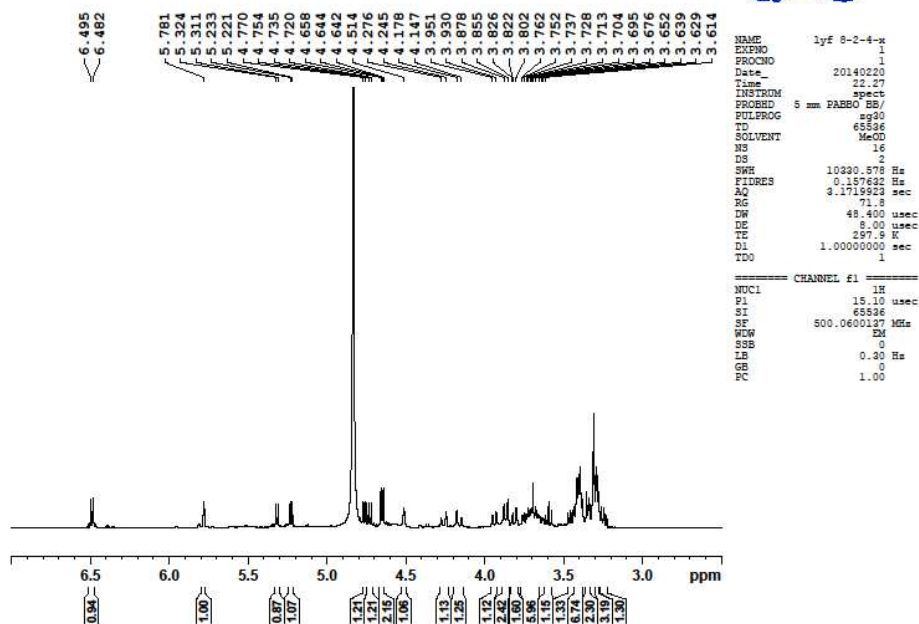

## S29. $^1\text{H}$ NMR Spectrum of compound 4 (500MHz, Methanol- $d_4$ )



BRUKER AV-III-500 13C-NMR LYF 8-2-4-X IN MEOD 2014.02.13

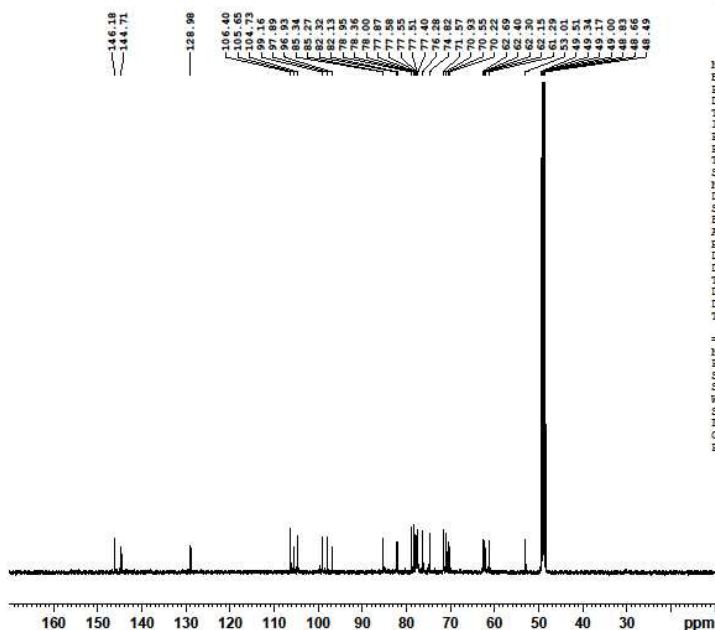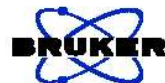

```

NAME      lyf 8-2-4-x
EXPNO     1
PROCNO    1
Date_     20140213
Time      19.14
INSTRUM   spect
PROBHD    5 mm FAREO BB/
PULPROG   zgpg30
TD         65536
SOLVENT   MeOD
NS         1947
DS         4
SWH        29761.904 Hz
FIDRES     0.484131 Hz
AQ         1.1010548 sec
RG         203
DW         16.800 usec
DE         6.50 usec
TE         298.2 K
D1         1.00000000 sec
D11        0.03000000 sec
TDO        800

===== CHANNEL f1 =====
NUC1       13C
P1         10.00 usec
SI         32768
SF         125.7400176 MHz
WDW        EM
SSB        0
LB         1.00 Hz
GB         0
PC         1.40
  
```

S30.  $^{13}\text{C}$  NMR Spectrum of compound **4** (125 MHz, Methanol- $d_4$ )

BRUKER AV-III-500 COSY-NMR LYF 8-2-4-X IN MeOD 2014.02.20

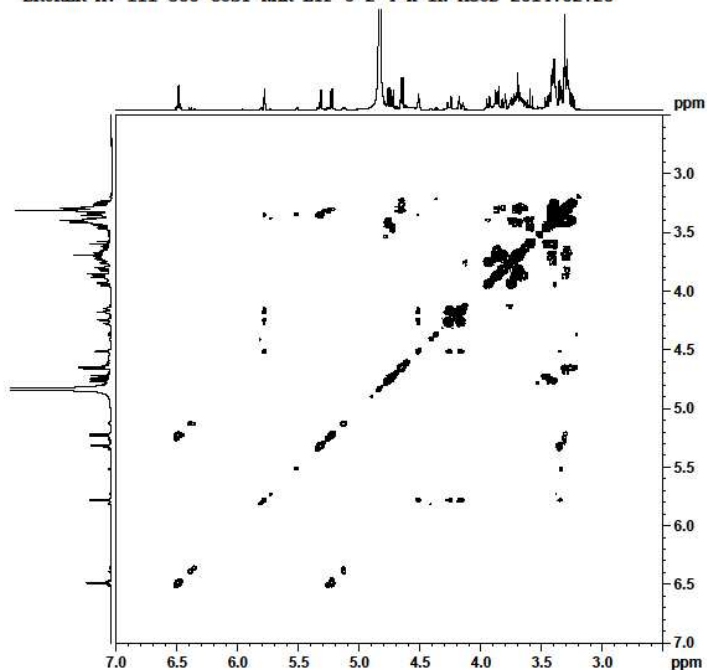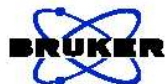

```

NAME      lyf 8-2-4-x
EXPNO     2
PROCNO    1
Date_     20140220
Time      22.28
INSTRUM   spect
PROBHD    5 mm FAREO BB/
PULPROG   cosygpcfgt
TD         2048
SOLVENT   MeOD
NS         8
DS         2
SWH        4000.000 Hz
FIDRES     1.958125 Hz
AQ         0.2860000 sec
RG         203
DW         125.000 usec
DE         8.00 usec
TE         298.0 K
D0         0.00000000 sec
D1         1.00000000 sec
D13        0.00000400 sec
D16        0.00020000 sec
INQ        0.00024995 sec

===== CHANNEL f1 =====
NUC1       1H
P1         15.10 usec
ND0        1
TD         256
SF01       500.062 MHz
FIDRES     15.626941 Hz
SW         8.000 ppm
F2MODE     QF
SI         1024
SF         500.0600120 MHz
RGW        SINE
SSB        0
LB         0.00 Hz
GB         0
PC         1.40
SI         1024
MC2        QF
SF         500.0600119 MHz
RGW        SINE
SSB        0
LB         0.00 Hz
GB         0
  
```

S31.  $^1\text{H}$ - $^1\text{H}$  COSY Spectrum of compound **4**

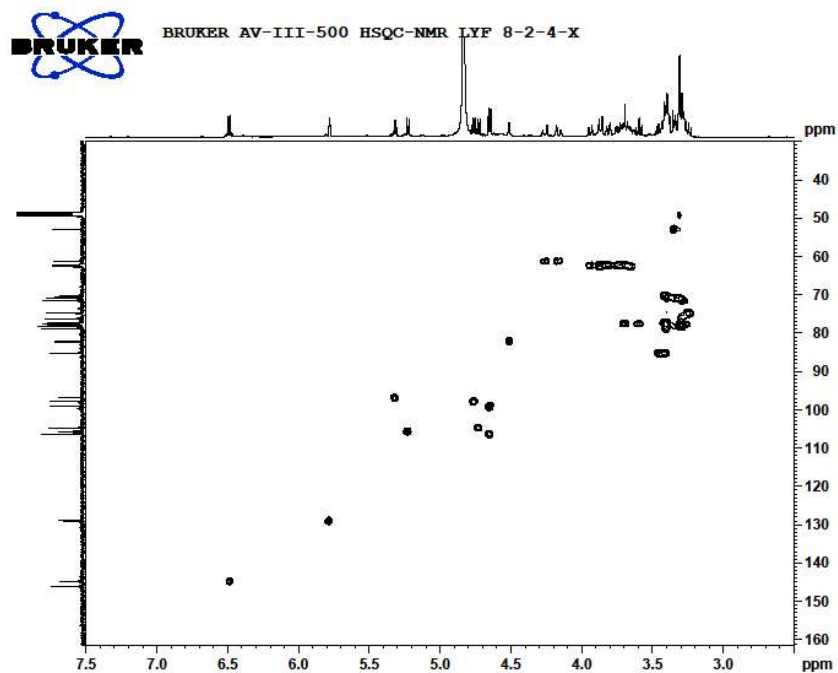

S32. HSQC Spectrum of compound 4

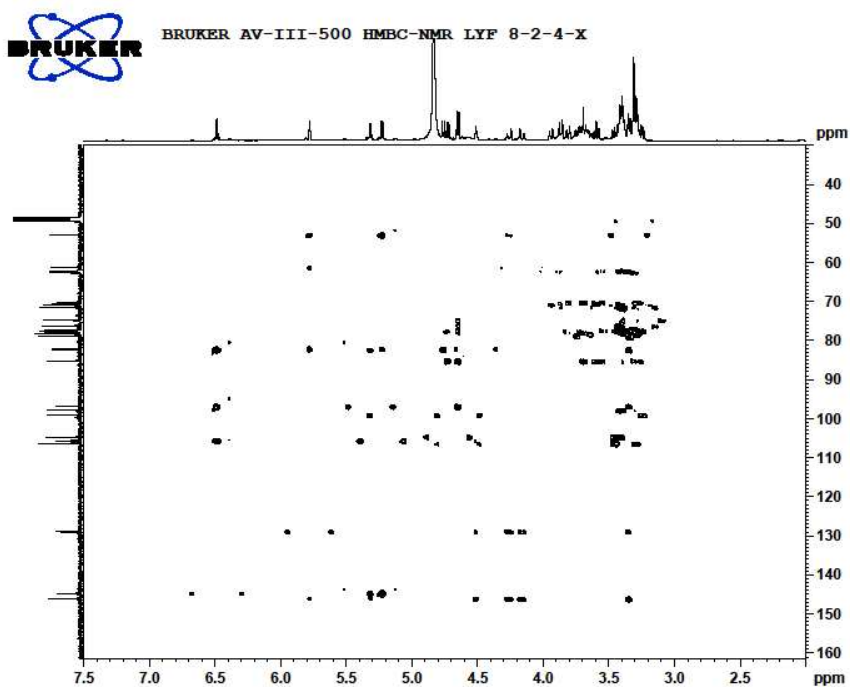

S33. HMBC Spectrum of compound 4

BRUKER AV-III-500 ROESY-NMR LYF 8-2-4-X IN MeOD 2014.02.20

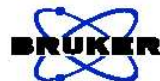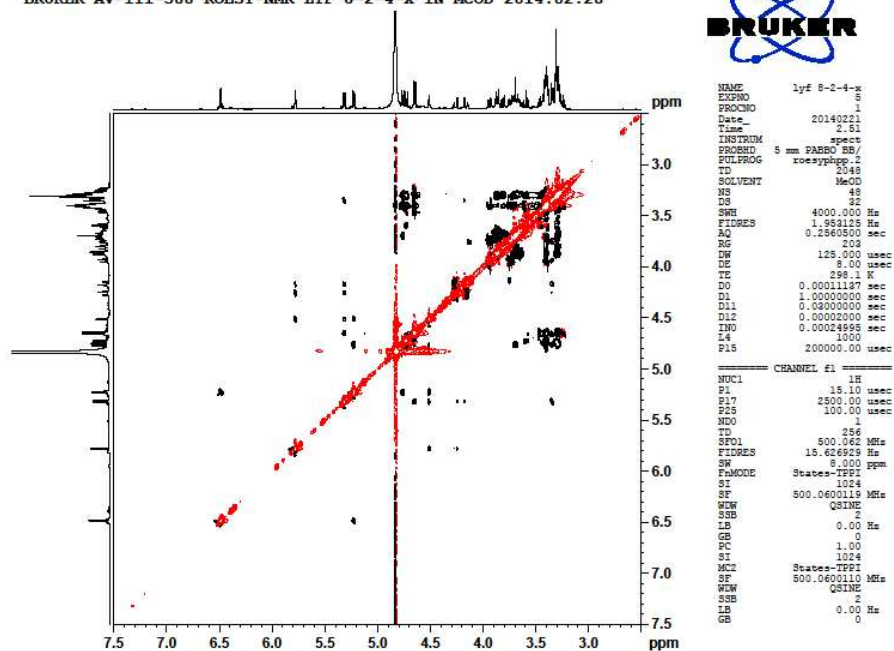

### S34. ROESY Spectrum of compound 4

MS Formula Results: + Scan (2.850 min) Sub (2014090901.d)

| m/z      | Ion                | Formula        | Abundance |
|----------|--------------------|----------------|-----------|
| 871.2694 | (M+H) <sup>+</sup> | C33 H52 N2 O25 | 251423.3  |

| Best | Formula (M)    | Ion Formula       | Score | Cross Score | Mass     | Calc Mass | Calc m/z | Diff (ppm) | Ass Diff (ppm) | Mass Match | Abund Match | Spacing Match | OBE |
|------|----------------|-------------------|-------|-------------|----------|-----------|----------|------------|----------------|------------|-------------|---------------|-----|
| ✓    | C33 H52 N2 O25 | C33 H52 N2 Na O25 | 99.97 |             | 848.2802 | 848.2799  | 871.265  | -4.30      | 0.31           | 99.98      | 99.98       |               | 4   |
| ✓    | C38 H52 N2 O27 | C38 H52 N2 Na O27 | 99.13 |             | 848.2802 | 848.2757  | 871.265  | -5.25      | 5.20           | 99.06      | 98.63       | 99.91         |     |
| ✓    | C39 H48 N2 O19 | C39 H48 N2 Na O19 | 98.92 |             | 848.2802 | 848.2651  | 871.2743 | 5.8        | 5.8            | 98.84      | 97.93       | 99.86         | 17  |
| ✓    | C46 H44 N2 O14 | C46 H44 N2 Na O14 | 97.75 |             | 848.2802 | 848.2793  | 871.2685 | -1.12      | 1.12           | 99.96      | 92.36       | 99.84         | 25  |

### S35. HRESIMS Spectrum of compound 4

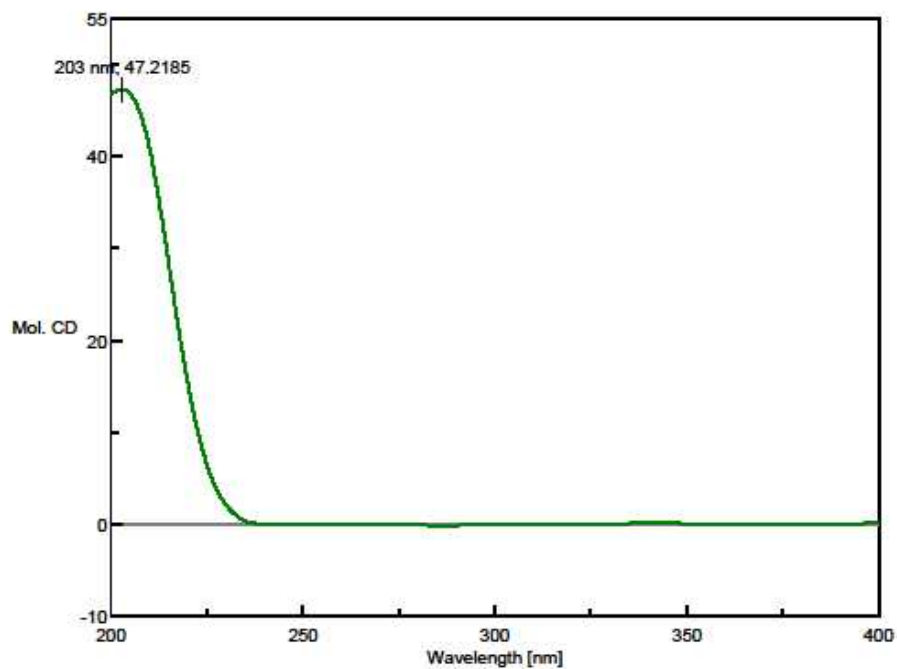

### S36. CD Spectrum of compound 4 (CH<sub>3</sub>OH)

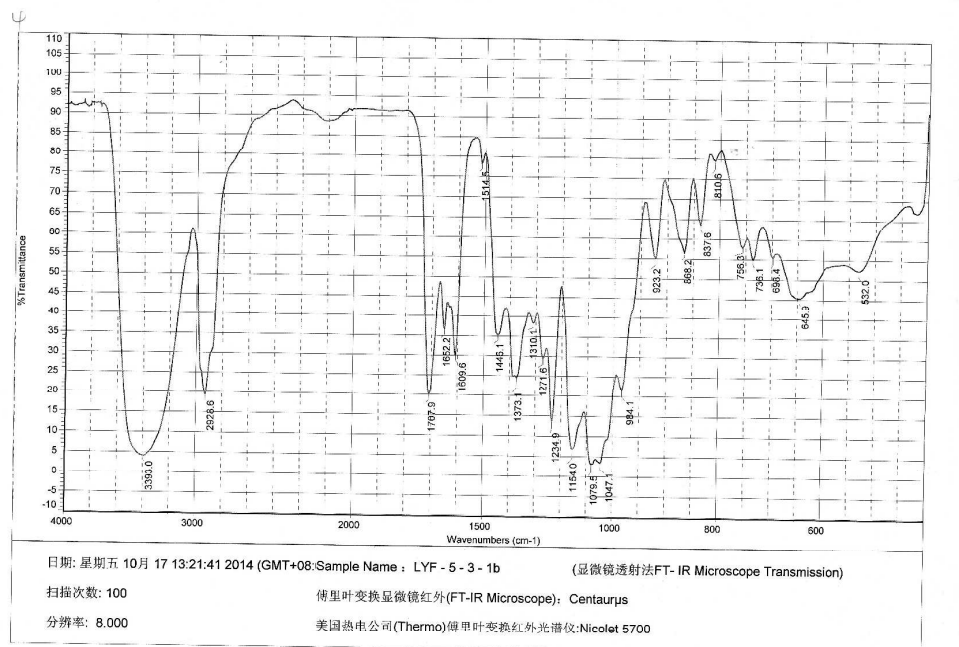

S37. IR Spectrum of compound **5**

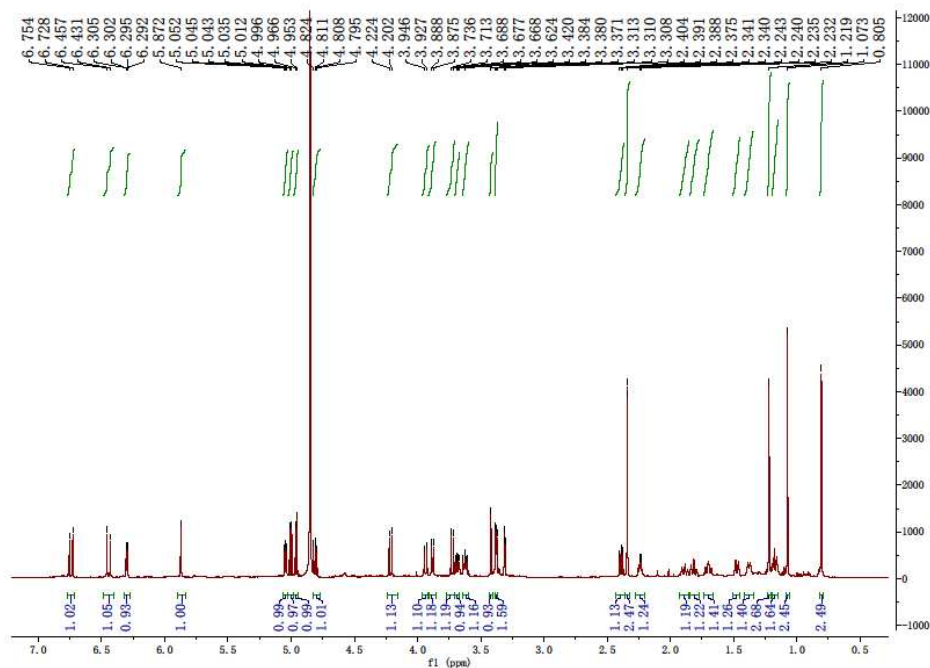

S38. <sup>1</sup>H NMR Spectrum of compound **5** (600 MHz, Methanol-d<sub>4</sub>)

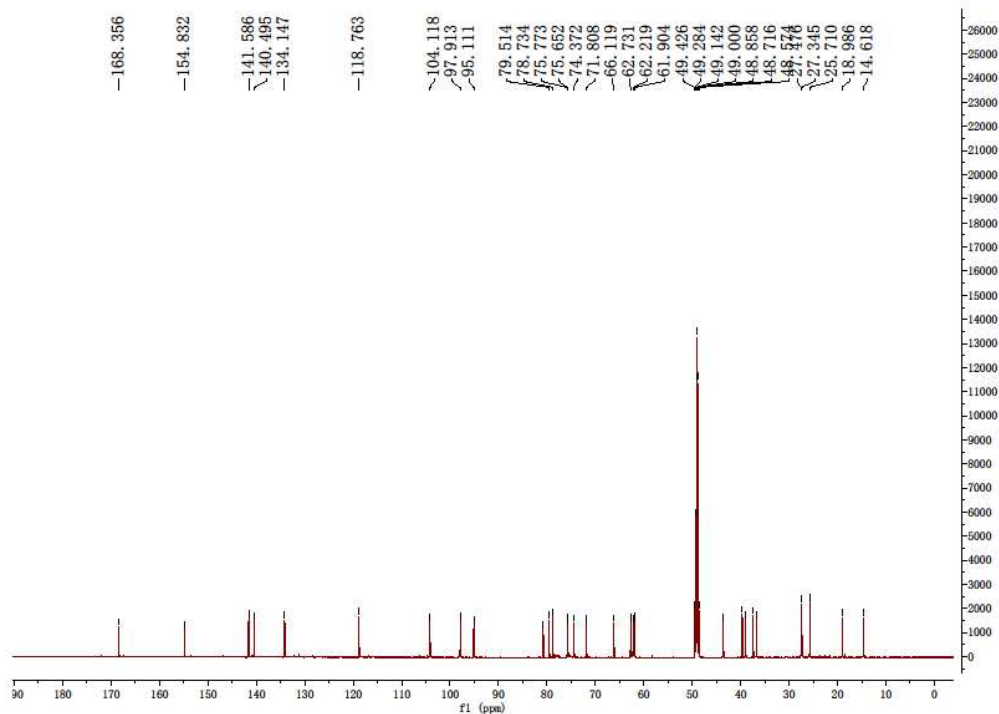

S39.  $^{13}\text{C}$  NMR Spectrum of compound **5** (150 MHz, Methanol- $d_4$ )

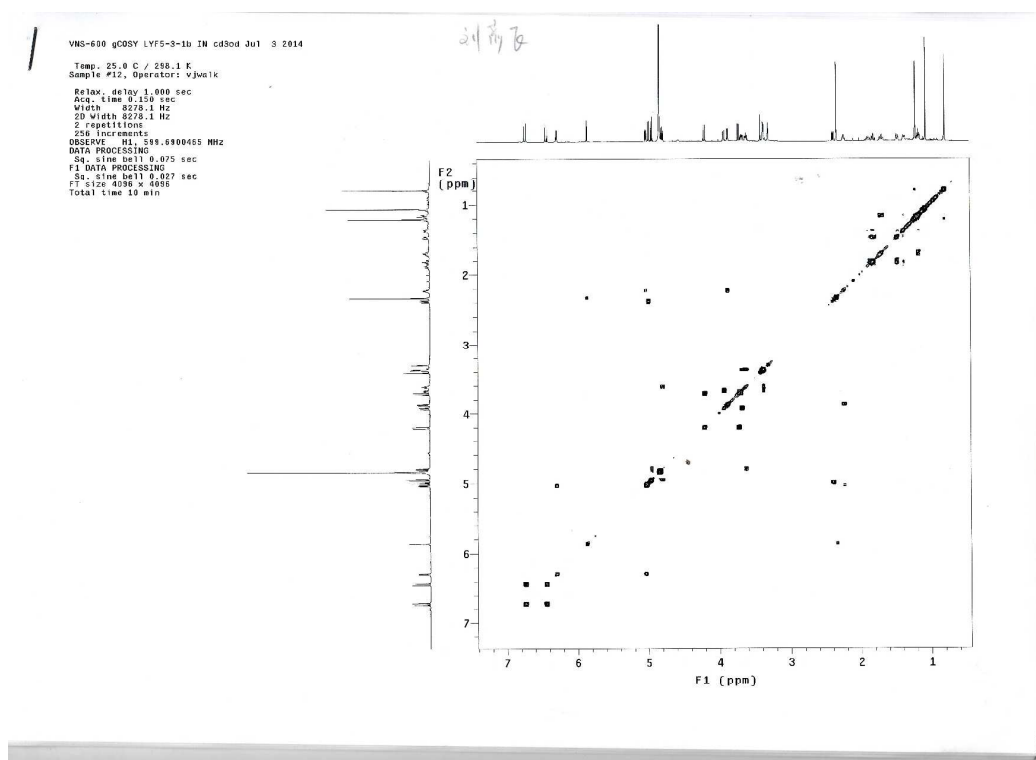

S40.  $^1\text{H}$ - $^1\text{H}$  COSY Spectrum of compound **5**

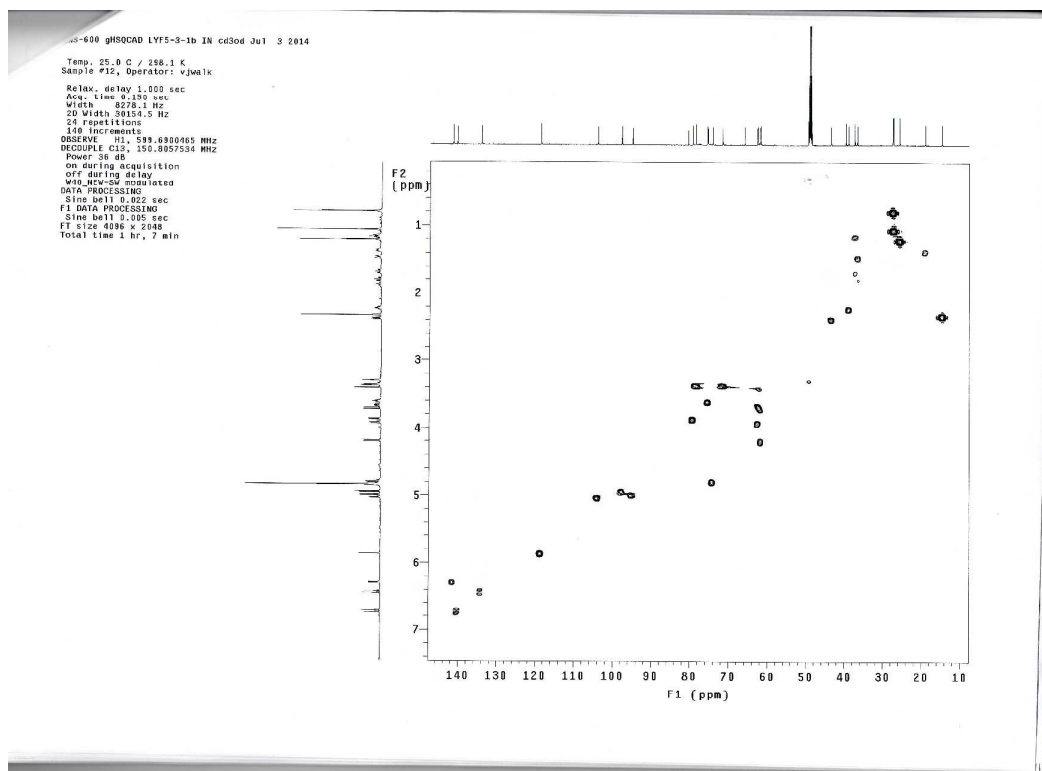

S41. HSQC Spectrum of compound **5**

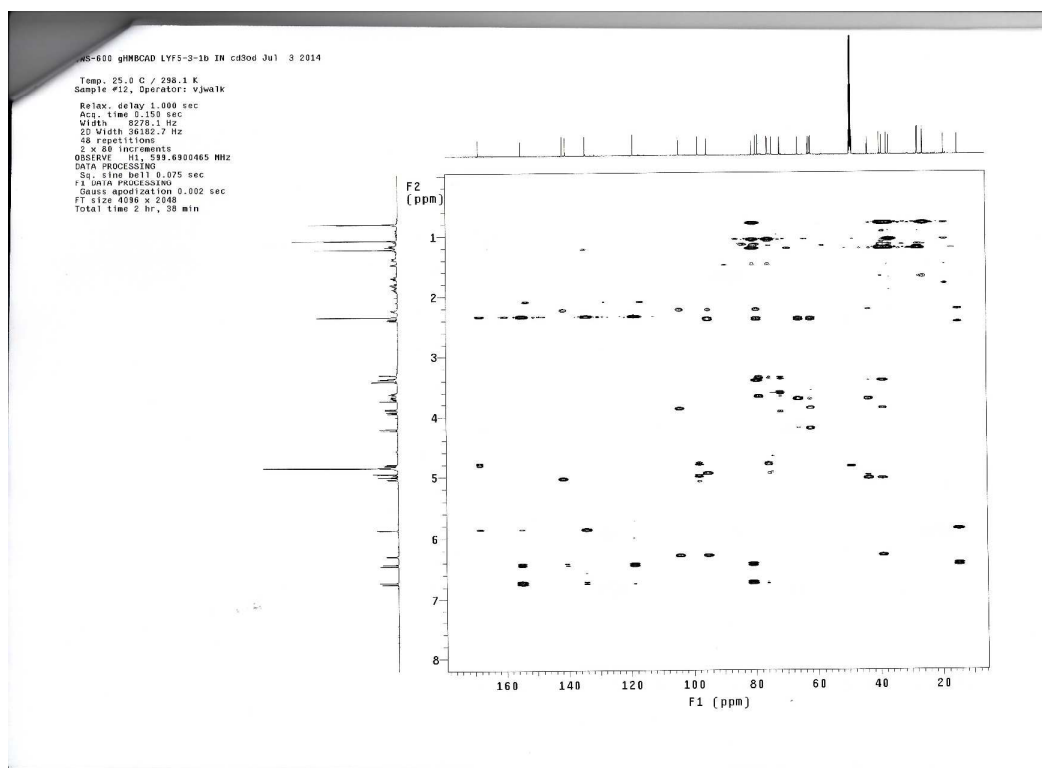

S42. HMBC Spectrum of compound **5**

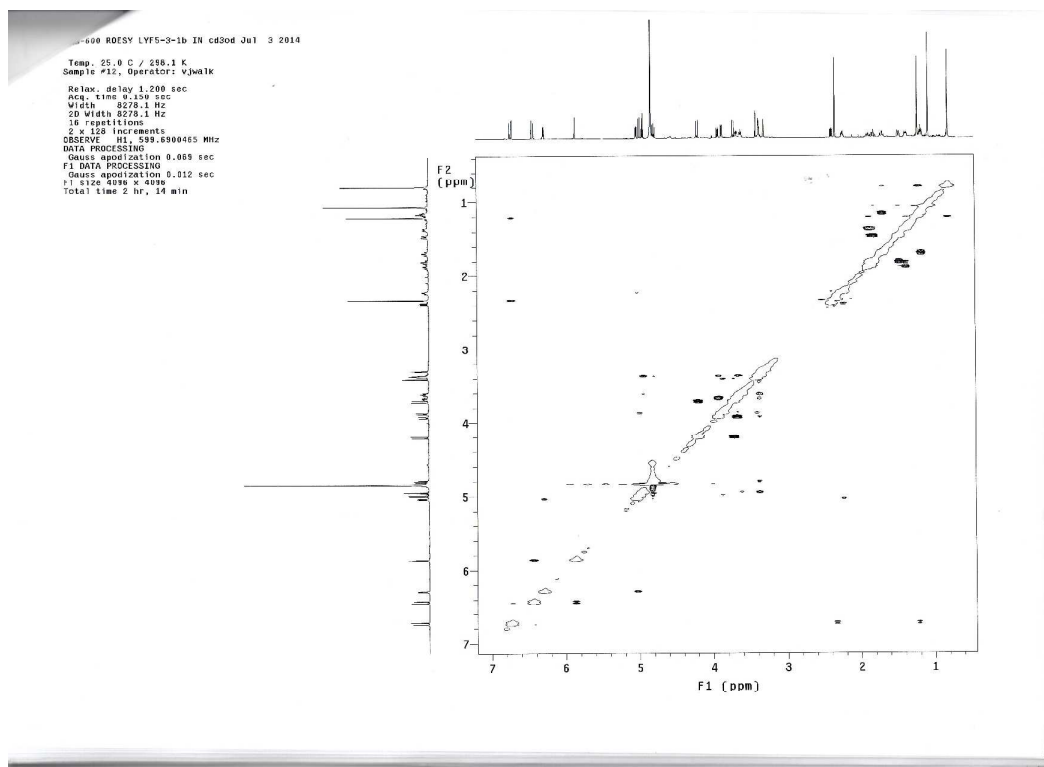

S43. ROESY Spectrum of compound **5**

MS Formula Results: + Scan (6.380 min) Sub (2014090902.d)

| m/z     | Ion                | Formula        | Abundance |
|---------|--------------------|----------------|-----------|
| 635.268 | HM-Na <sup>+</sup> | C30 H44 Na O15 | 1876227.9 |

  

| Ref | Formula (M)   | Ion Formula      | Score | Cross Score | Mass     | Calc. Mass | Calc. m/z | Diff (ppm) | Abs. OR (ppm) | Mass Match | Abund. Match | Spacing Match | DRE |
|-----|---------------|------------------|-------|-------------|----------|------------|-----------|------------|---------------|------------|--------------|---------------|-----|
| ✓   | C30 H44 O15   | C30 H44 Na O15   | 99.87 |             | 632.2768 | 632.2777   | 635.2674  | -1.02      | 1.02          | 99.87      | 99.87        | 99.87         | 5   |
| ✓   | C43 H56 N2 O2 | C43 H56 N2 Na O2 | 97.87 |             | 612.2768 | 612.2777   | 635.2669  | -1.68      | 1.68          | 99.88      | 93.18        | 99.9          | 27  |

S44. HRESIMS Spectrum of compound **5**

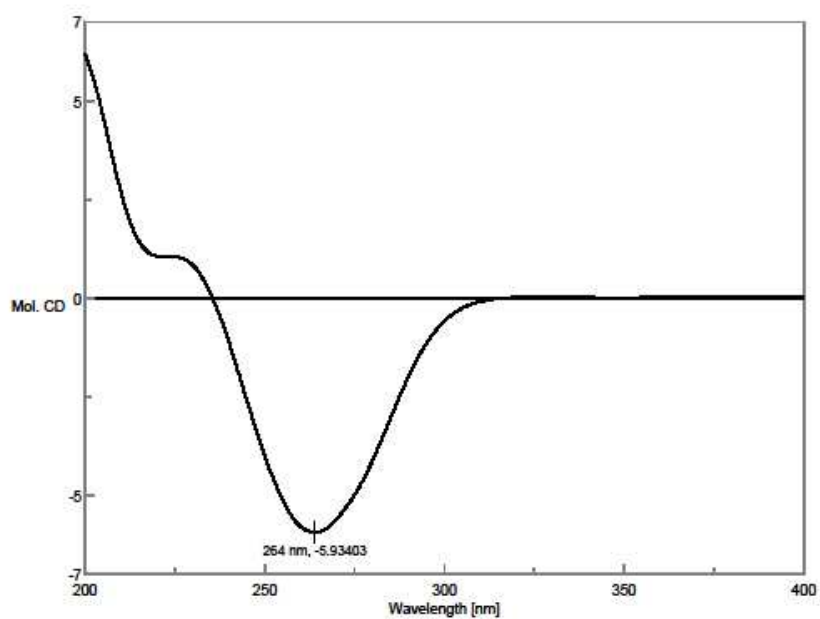

S45. CD Spectrum of compound **5** (CH<sub>3</sub>OH)



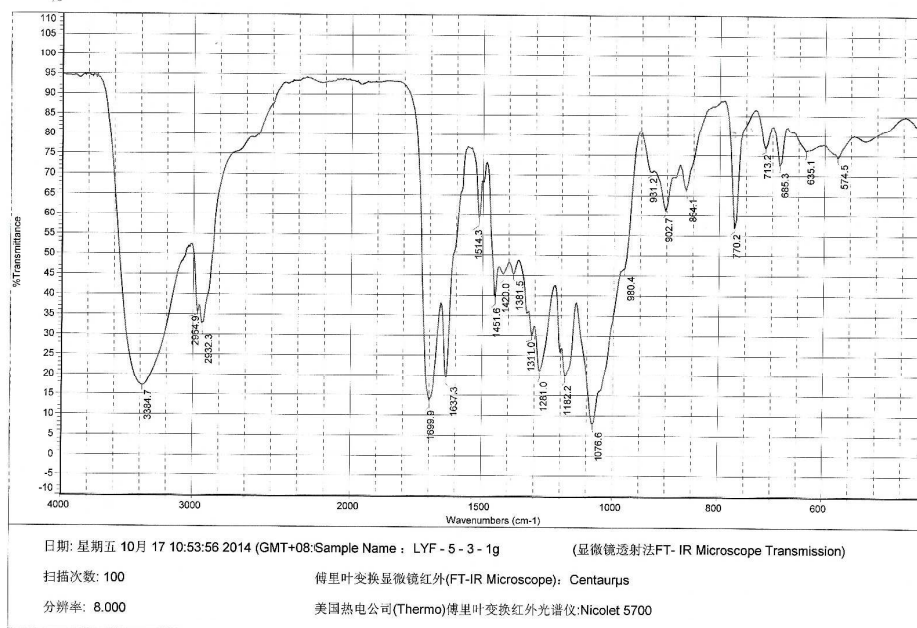

S46. IR Spectrum of compound 6

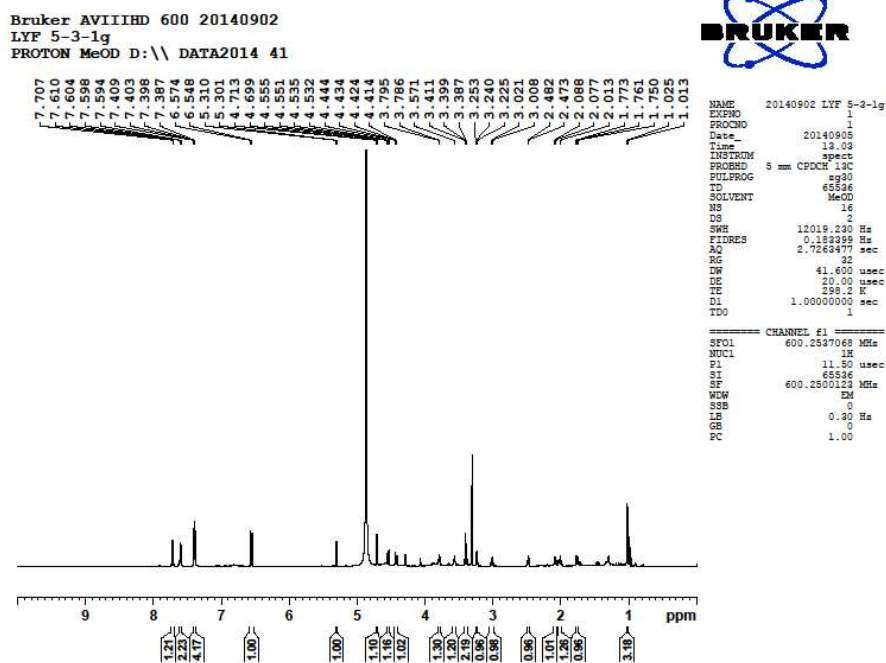

S47.  $^1\text{H}$  NMR Spectrum of compound 6 (600MHz, Methanol- $d_4$ )



Bruker AVIIIHD 600 20140701  
C13 MeOD D:\ DATA2014 30

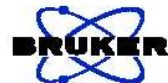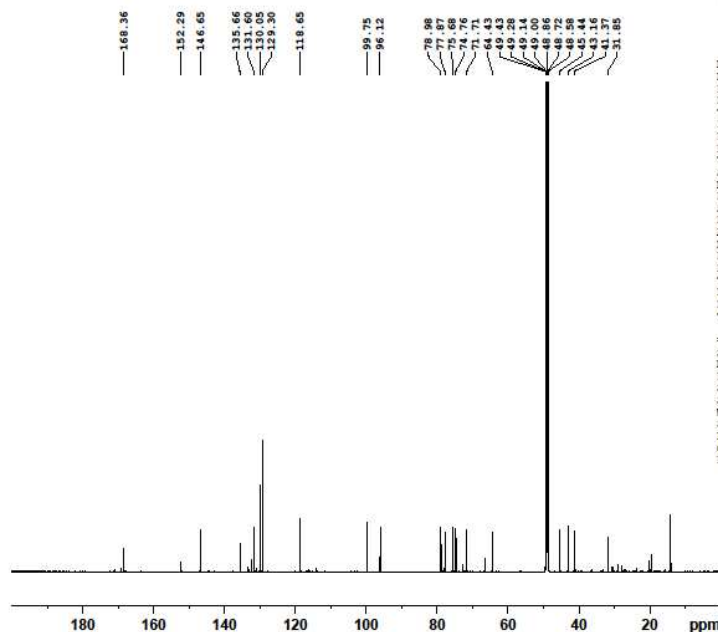

NAME 20140902 LYF 5-3-1g  
EXPNO 1  
PROCNO 1  
Date 20140706  
Time 16.33  
INSTRUM spect  
PROBHD 5 mm CPDCH 13C  
PULPROG zgpg30  
TD 65536  
SOLVENT MeOD  
NS 2000  
DS 4  
SWH 36087.691 Hz  
FIDRES 0.550197 Hz  
AQ 0.9089159 sec  
RG 2050  
DW 13.867 usec  
DE 31.37 usec  
TE 298.2 K  
D1 1.00000000 sec  
D11 0.02000000 sec  
TD0 250

===== CHANNEL f1 =====  
SFO1 150.9495843 MHz  
NUC1 13C  
P1 12.84 usec  
SI 32768  
SF 150.9327723 MHz  
WVW EM  
SSB 0  
LB 1.00 Hz  
GB 0  
PC 1.40

S48.  $^{13}\text{C}$  NMR Spectrum of compound 6 (150 MHz, Methanol- $d_4$ )

Bruker AVIIIHD 600 20140902  
LYF 5-3-1g  
[H-H COSY] MeOD D:\ DATA2014 41

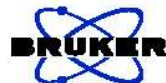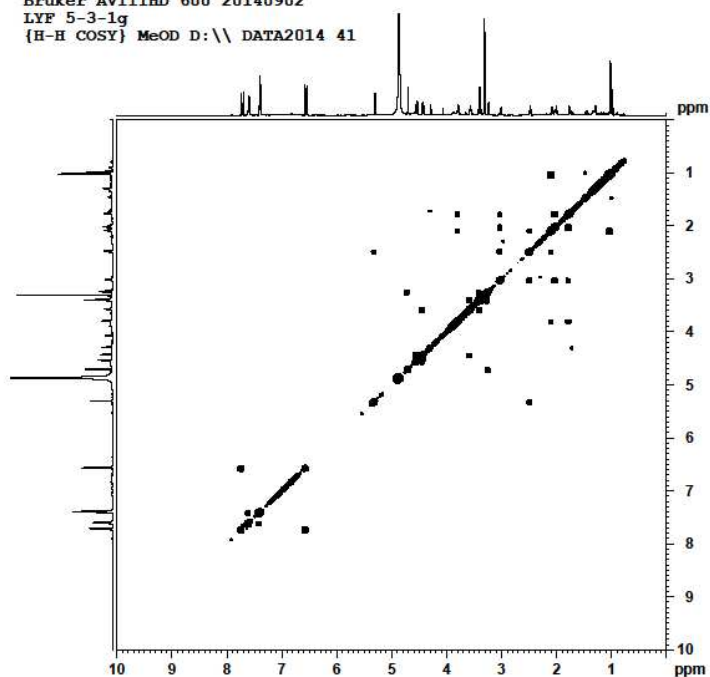

NAME 20140902 LYF 5-3-1g  
EXPNO 2  
PROCNO 1  
Date 20140905  
Time 12.04  
INSTRUM spect  
PROBHD 5 mm CPDCH 13C  
PULPROG cosygpgpgf  
TD 2048  
SOLVENT MeOD  
NS 2  
DS 16  
SWH 12019.220 Hz  
FIDRES 5.868768 Hz  
AQ 0.0852468 sec  
RG 161  
DW 41.600 usec  
DE 20.00 usec  
TE 298.2 K  
D0 0.00000000 sec  
D1 1.00000000 sec  
D11 0.02000000 sec  
D12 0.00002000 sec  
D16 0.00020000 sec  
IN0 0.0000820 sec

===== CHANNEL f1 =====  
SFO1 600.2536088 MHz  
NUC1 1H  
P0 11.50 usec  
P1 11.50 usec  
P17 2500.00 usec  
NDO 1  
TD 256  
SFO1 600.13346 MHz  
FIDRES 46.950119 Hz  
SW 20.024 ppm  
F2MODE QF  
SI 1024  
SF 600.2500000 MHz  
WVW QSINE  
SSB 0  
LB 0.00 Hz  
GB 0  
PC 1.40  
SI 1024  
MC2 QF  
SF 600.2500000 MHz  
WVW QSINE  
SSB 0  
LB 0.00 Hz  
GB 0

S49.  $^1\text{H}$ - $^1\text{H}$  COSY Spectrum of compound 6

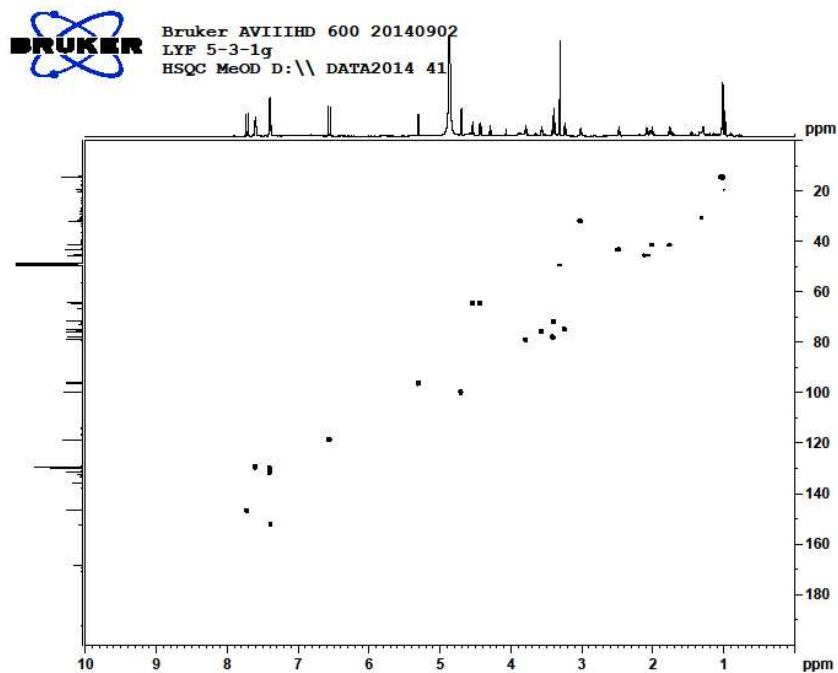

S450. HSQC Spectrum of compound **6**

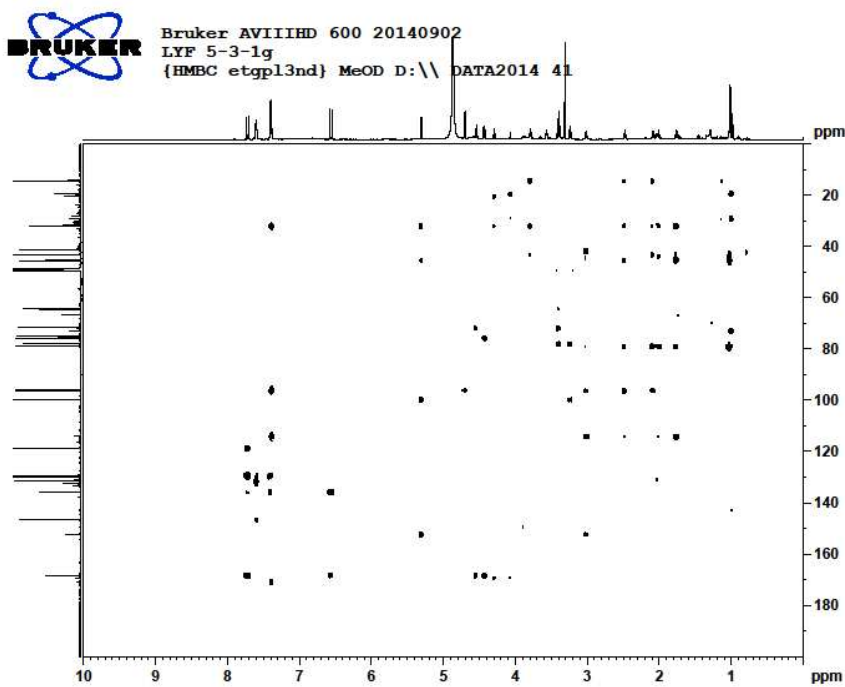

S51. HMBC Spectrum of compound **6**

Bruker AVIIIHD 600 20140902  
LYF 5-3-1g  
NOESY\_2D MeOD D:\ DATA2014 41

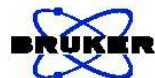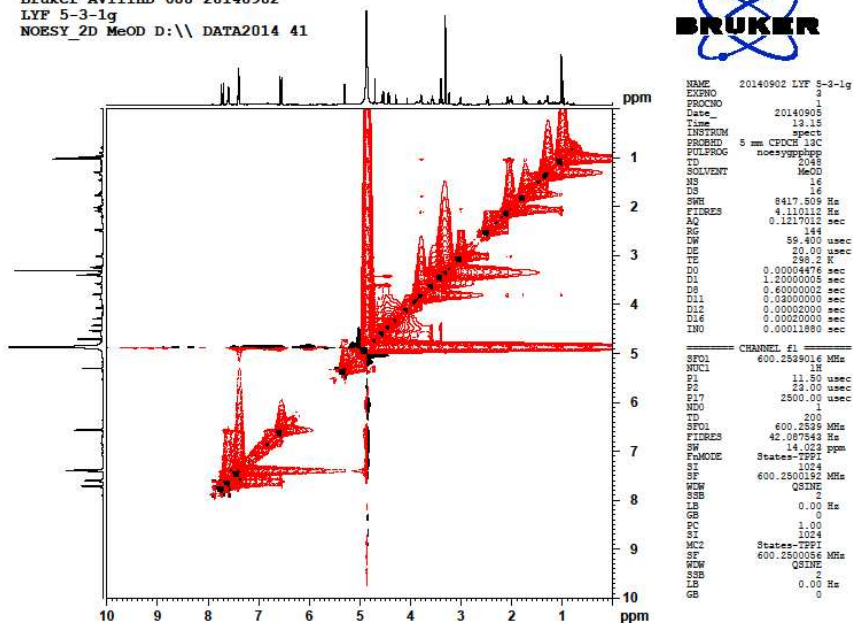

S52. NOESY Spectrum of compound 6

MS Formula Results: + Scan (6.422 min) Sub (2014090904.d)

| m/z      | Ion                 | Formula        | Abundance |             |          |           |          |            |                |            |             |               |     |
|----------|---------------------|----------------|-----------|-------------|----------|-----------|----------|------------|----------------|------------|-------------|---------------|-----|
| 507.1861 | (M+H) <sup>+</sup>  | C25 H31 O11    | 72504.1   |             |          |           |          |            |                |            |             |               |     |
| Best     | Formula (M)         | Ion Formula    | Score     | Cross Score | Mass     | Calc Mass | Calc m/z | Diff (ppm) | Abs Diff (ppm) | Mass Match | Abund Match | Spacing Match | DBE |
| ✓        | C25 H31 O11         | C25 H31 O11    | 99.90     |             | 506.1700 | 506.1738  | 507.1861 | 0.01       | 0.01           | 100        | 99.90       | 99.90         | 11  |
| m/z      | Ion                 | Formula        | Abundance |             |          |           |          |            |                |            |             |               |     |
| 529.1876 | (M+Na) <sup>+</sup> | C25 H30 Na O11 | 142177.9  |             |          |           |          |            |                |            |             |               |     |
| Best     | Formula (M)         | Ion Formula    | Score     | Cross Score | Mass     | Calc Mass | Calc m/z | Diff (ppm) | Abs Diff (ppm) | Mass Match | Abund Match | Spacing Match | DBE |
| ✓        | C25 H30 O11         | C25 H30 Na O11 | 99.94     |             | 506.1784 | 506.1788  | 529.1868 | 0.89       | 0.89           | 99.97      | 99.92       | 99.91         | 11  |

S53. HRESIMS Spectrum of compound 6

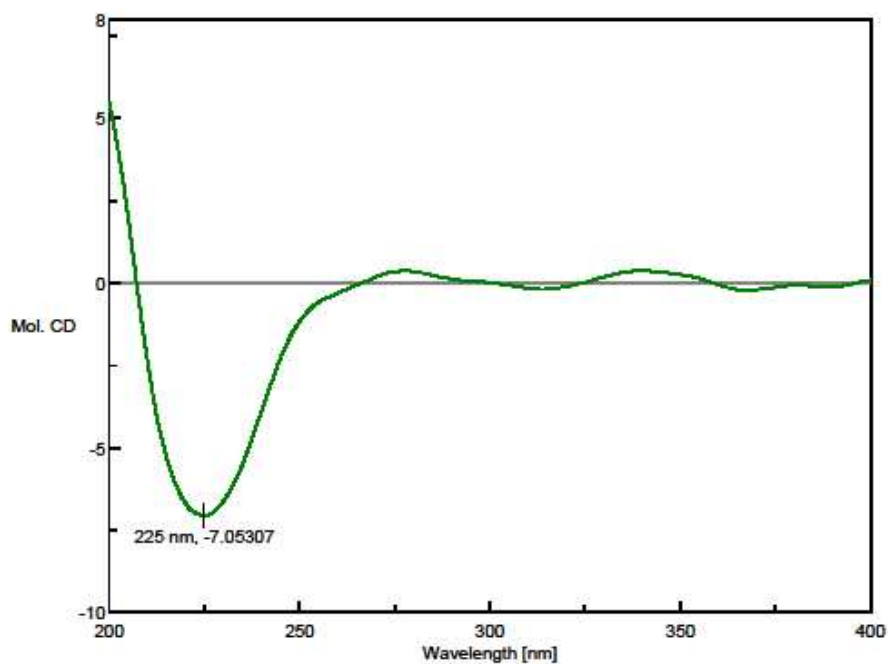

S54. CD Spectrum of compound 6 (CH<sub>3</sub>OH)

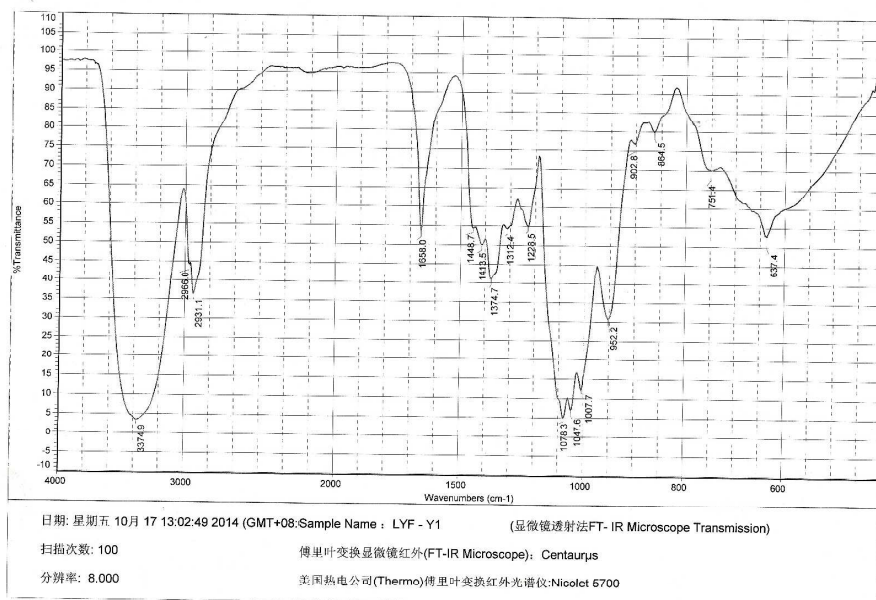

### S55. IR Spectrum of compound 7

BRUKER AV-III-500 1H-NMR LYF Y-1 IN MeOD 2014.01.10

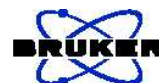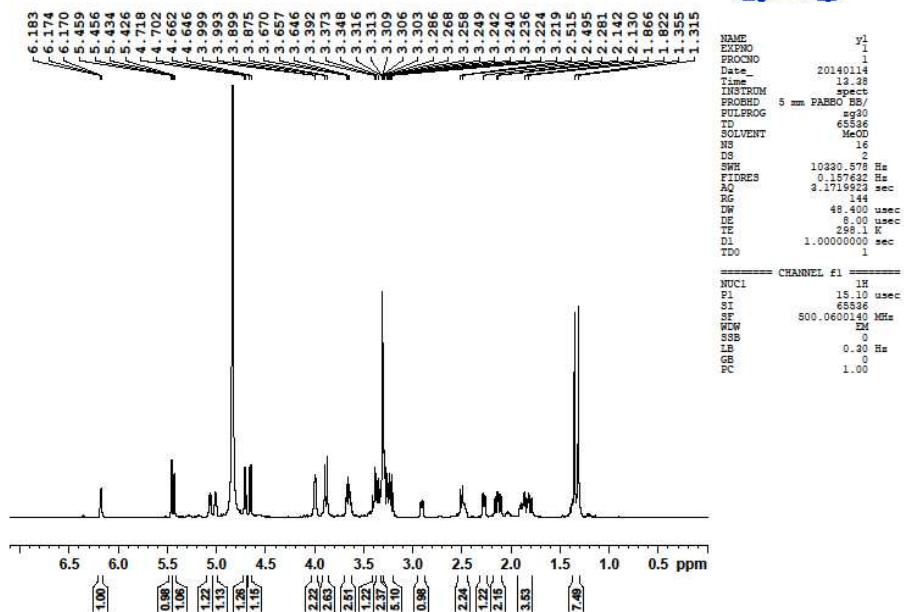

### S56. <sup>1</sup>H NMR Spectrum of compound 7 (500MHz, Methanol-d<sub>4</sub>)

BRUKER AV-III-500  $^{13}\text{C}$ -NMR LYF Y-1 IN MeOD 2014.01.10

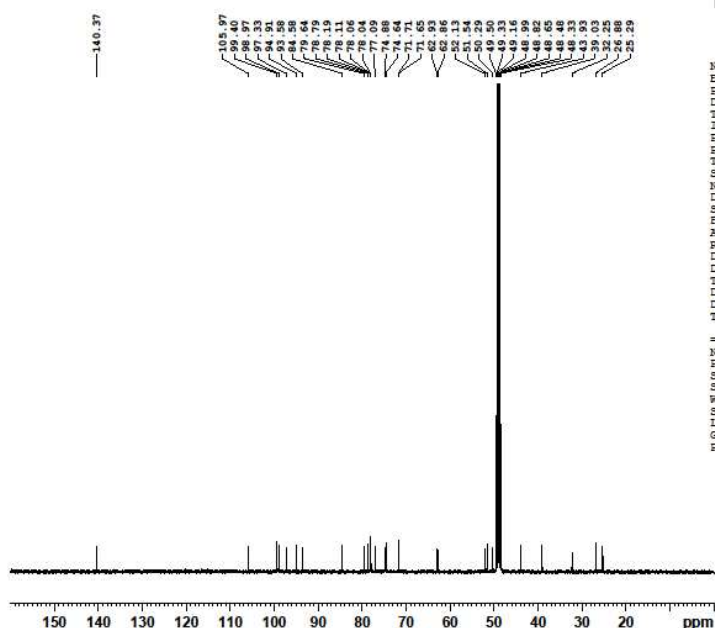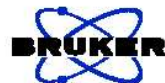

```

NAME          y1
EXPNO         2
PROCNO        1
Date_         20140114
Time          12.39
INSTRUM       spect
PROBHD        5 mm PABBO BB/
PULPROG       zgpg30
TD            65536
SOLVENT       MeOD
NS            1912
DS            4
SWH           29761.904 Hz
FIDRES        0.484131 Hz
AQ            1.1010548 sec
RG            203
DW            16.800 usec
DE            6.50 usec
TE            298.6 K
D1            1.00000000 sec
D11           0.03000000 sec
TDO           400

===== CHANNEL f1 =====
NUC1          13C
P1            10.00 usec
SI            29768
SF            125.7400148 MHz
WDW           EM
SSB           0
LB            1.00 Hz
GB            0
PC            1.40
  
```

S57.  $^{13}\text{C}$  NMR Spectrum of compound 7 (125 MHz, Methanol- $d_4$ )

BRUKER AV-III-500 COSY-NMR LYF Y-1 IN MeOD 2014.01.10

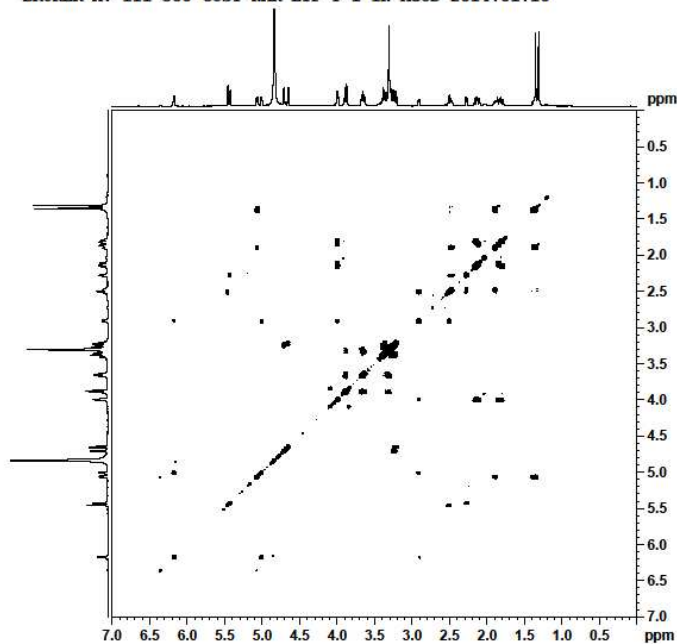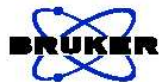

```

NAME          y1
EXPNO         3
PROCNO        1
Date_         20140115
Time          21.53
INSTRUM       spect
PROBHD        5 mm PABBO BB/
PULPROG       cosygpgf30
TD            2048
SOLVENT       MeOD
NS            1
DS            8
SWH           3501.401 Hz
FIDRES        1.709668 Hz
AQ            0.2925044 sec
RG            203
DW            142.800 usec
DE            8.00 usec
TE            297.7 K
D0            0.00000300 sec
D1            1.00000000 sec
D13           0.00000400 sec
D16           0.00020000 sec
IN0           0.00028570 sec

===== CHANNEL f1 =====
NUC1          1H
P1            15.10 usec
ND0           1
TD            1
SF01          500.0618 MHz
FIDRES        13.678598 Hz
SW            7.000 ppm
P1MODE        QF
SI            1024
SF            500.0600129 MHz
WDW           SINE
SSB           0
LB            0.00 Hz
GB            0
PC            1.40
SI            1024
MC2           QF
SF            500.0600126 MHz
WDW           SINE
SSB           0
LB            0.00 Hz
GB            0
  
```

S58.  $^1\text{H}$ - $^1\text{H}$  COSY Spectrum of compound 7

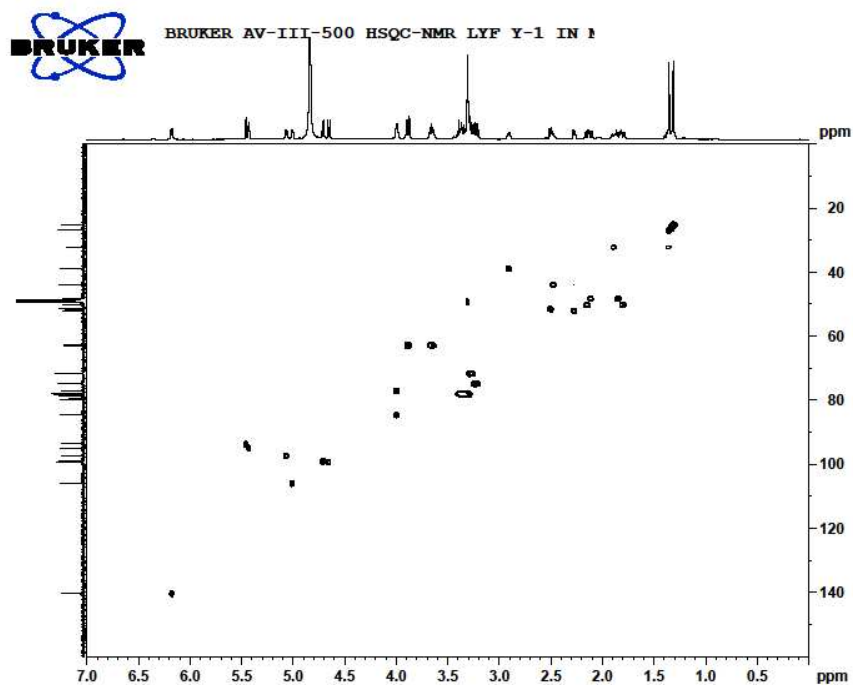

S59. HSQC Spectrum of compound 7

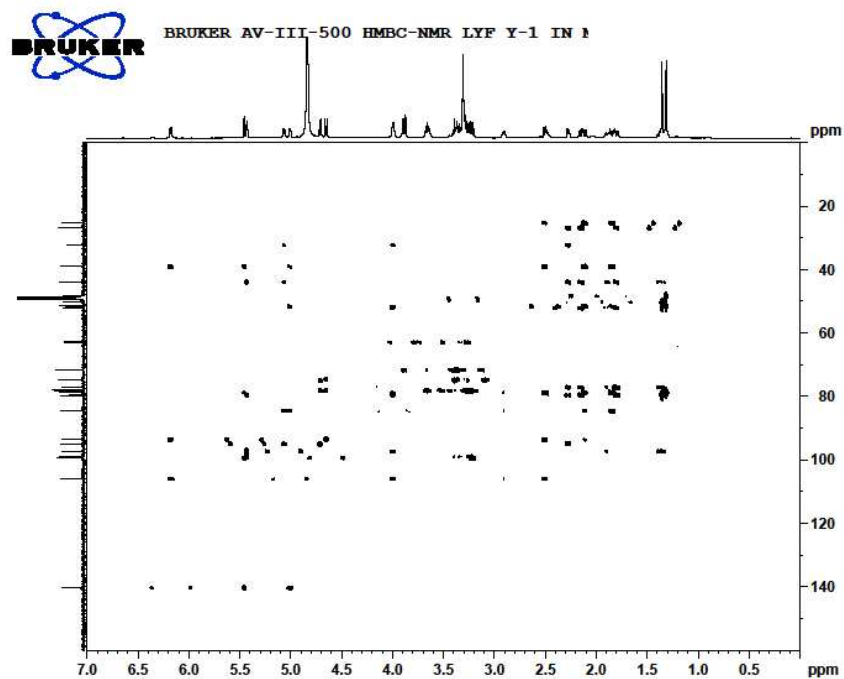

S60. HMBC Spectrum of compound 7

BRUKER AV-III-500 ROESY-NMR LYF Y-1 IN MeOD 2014.01.10

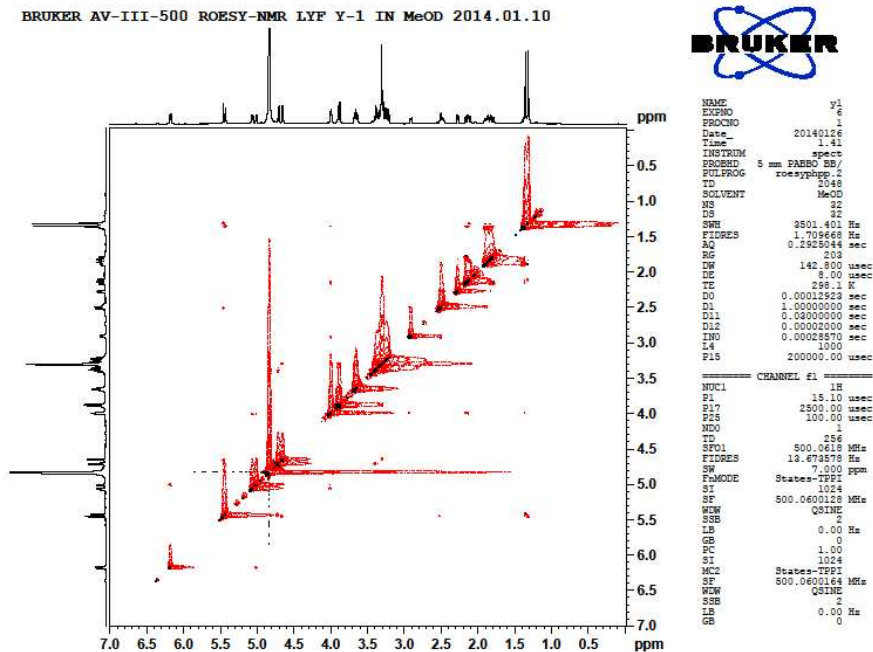

S61. ROESY Spectrum of compound 7

MS Formula Results: + Scan (3.520 min) Sub (2014090501.d)

| m/z      | Ion                 | Formula        | Abundance |
|----------|---------------------|----------------|-----------|
| 719.2748 | (M+Na) <sup>+</sup> | C30 H48 Na O18 | 411252.3  |

  

| Best | Formula (M)    | Ion Formula       | Score | Crash Score | Mass     | Calc Mass | Calc m/z | Diff (ppm) | Abs Diff (ppm) | Mass Match | Abund Match | Isotop Match | DBE |
|------|----------------|-------------------|-------|-------------|----------|-----------|----------|------------|----------------|------------|-------------|--------------|-----|
| ✓    | C30 H48 O18    | C30 H48 Na O18    | 99.89 |             | 696.2854 | 696.2841  | 719.2733 | -1.85      | 1.85           | 99.89      | 99.92       | 99.88        | 7   |
| ✓    | C38 H64 N2 O12 | C38 H64 N2 Na O12 | 98.5  |             | 696.2854 | 696.2854  | 719.2786 | 5.84       | 5.84           | 98.88      | 97.52       | 99.87        | 16  |
| ✓    | C43 H80 N2 O7  | C43 H80 N2 Na O7  | 97.42 |             | 696.2854 | 696.2836  | 719.2728 | -2.59      | 2.59           | 99.77      | 91.48       | 99.84        | 25  |

S62. HRESIMS Spectrum of compound 7

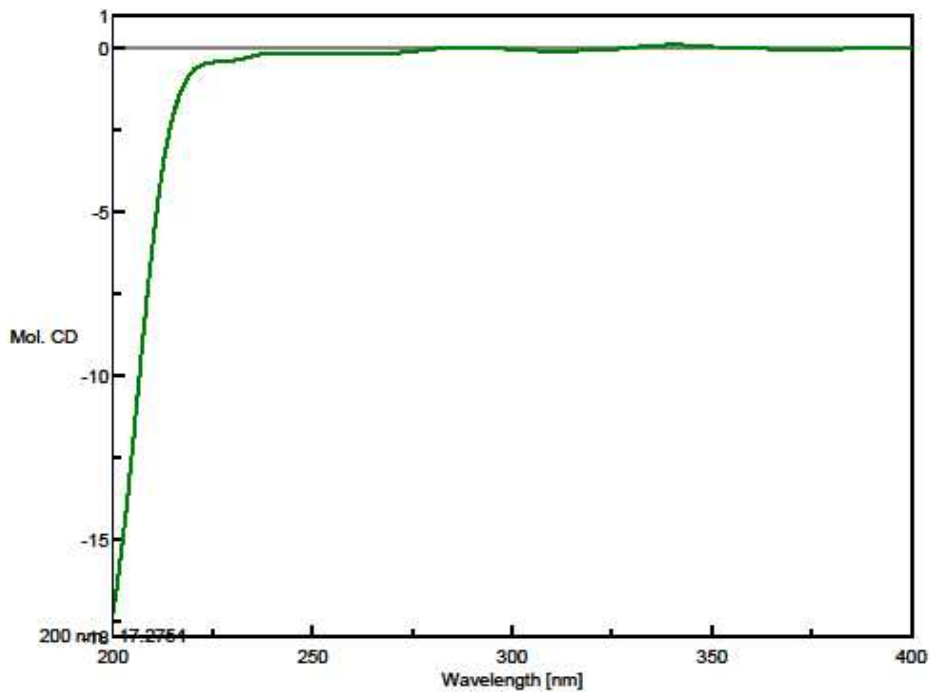

S63. CD Spectrum of compound 7 (CH<sub>3</sub>OH)



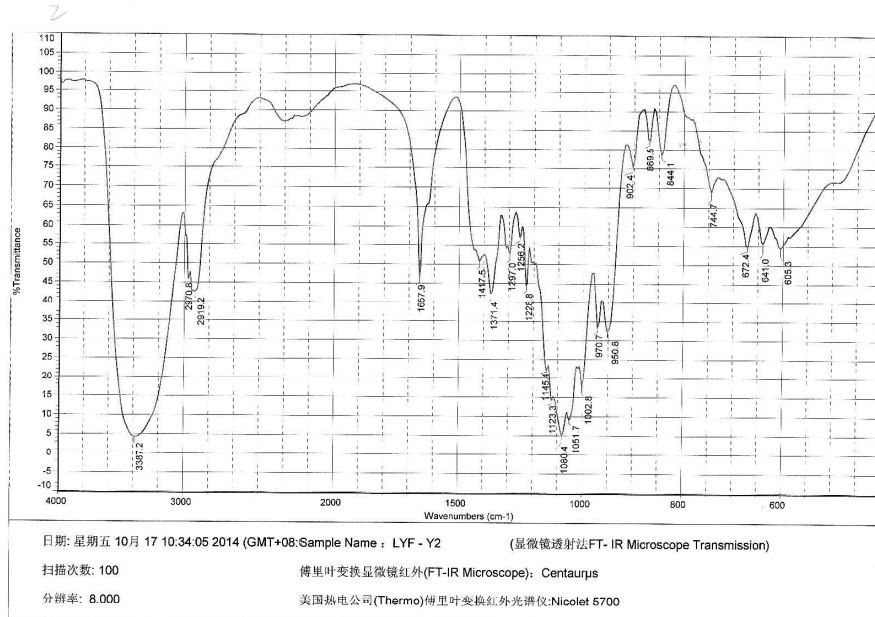

S64. IR Spectrum of compound 8

BRUKER AV-III-500 1H-NMR LYF Y-3 IN MeOD 2014.01.10

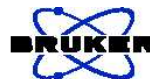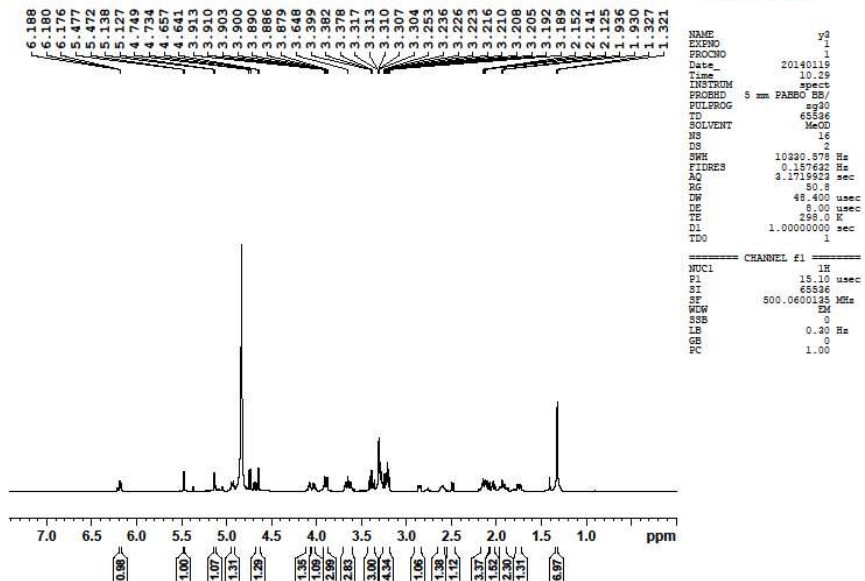

S65.  $^1\text{H}$  NMR Spectrum of compound 8 (500MHz, Methanol- $d_4$ )



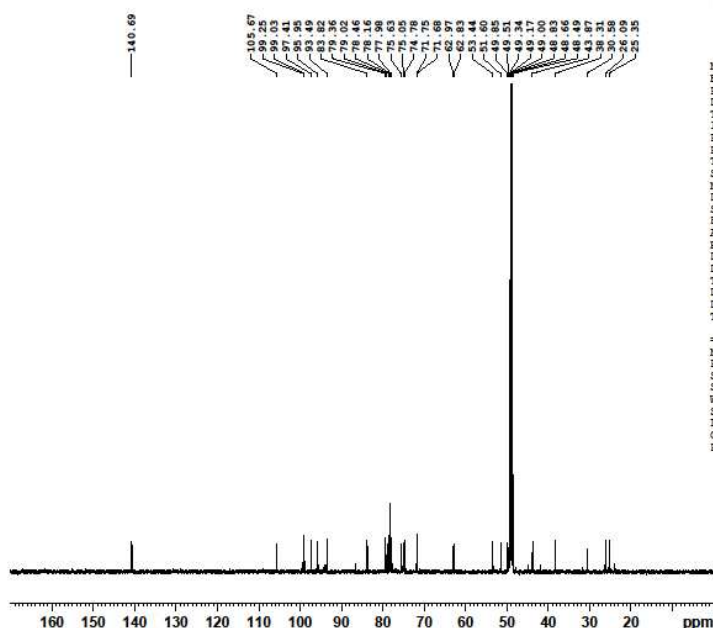

```
NAME                                     y2
EXPNO                                   2
PROCNO                                  1
Date_   _                               20140119
Time_    _                              10.31
INSTRUM                                    spect
PROBHD      5 mm PABBO BEP              spec
PULPROG          zgpg30                 prog
TD             65536                     size
SOLVENT                                MeOD
NS               32                       scans
DS                4                      DS
SWH            29761.904 Hz              freq
FIDRES         0.484141 Hz              fwhm
AQ             1.1010548 sec             time
RG              203                      pixels
DE             16.800                    um
TE           6.50                        degC
WE           298.6                        K
D1            1.000000000 sec            delay
D11           0.030000000 sec            d11
TD0            400                       points
===== CHANNEL 12 =====
NUC1              13C
P1              10.00 usec
SI              32768
SF       125.74000173 MHz
PC              EM
SSB
LB              1.00 Hz
GB
FC              1.40
```

S66.  $^{13}\text{C}$  NMR spectrum of compound **8** (125 MHz, Methanol- $d_4$ )

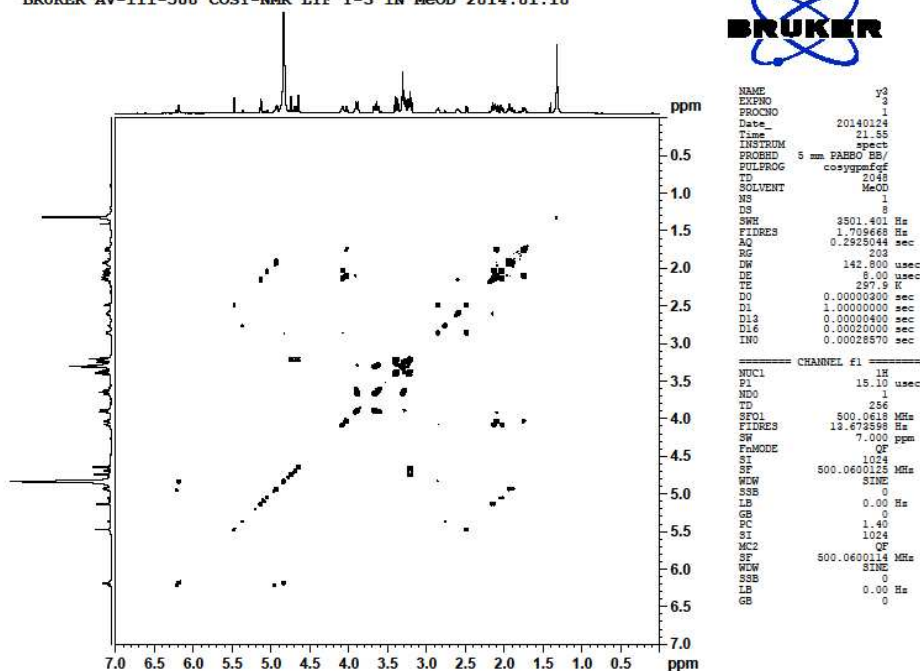

S67.  $^1\text{H}$ - $^1\text{H}$  COSY Spectrum of compound **8**

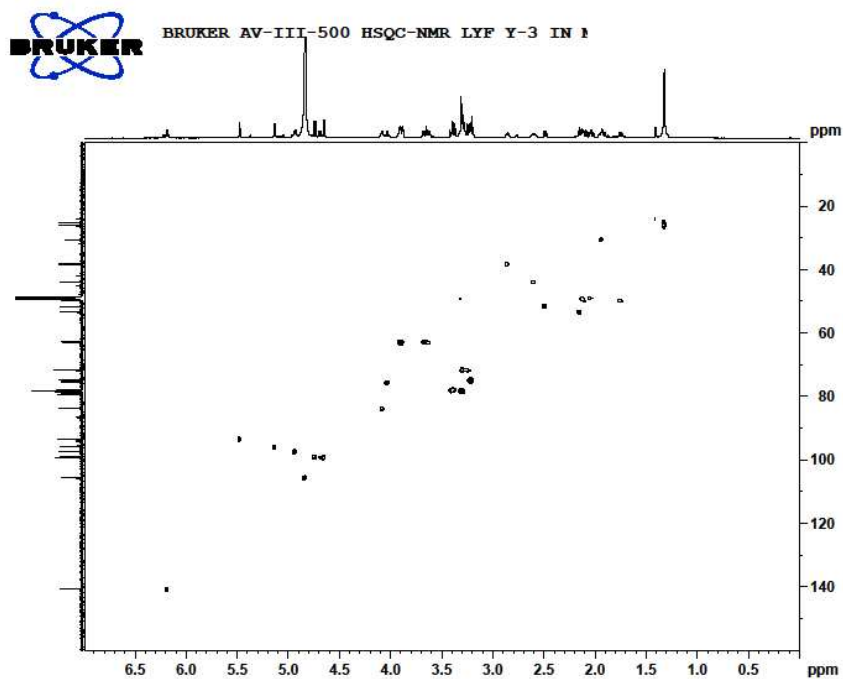

S68. HSQC Spectrum of compound **8**

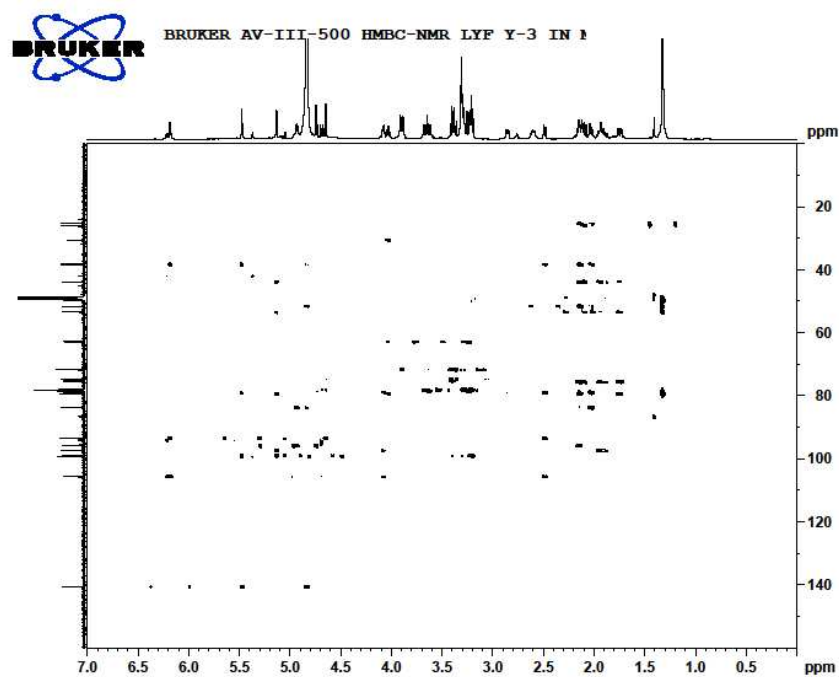

S69. HMBC Spectrum of compound **8**

BRUKER AV-III-500 ROESY-NMR LYF Y-3 IN MeOD 2014.01.10

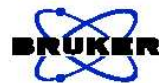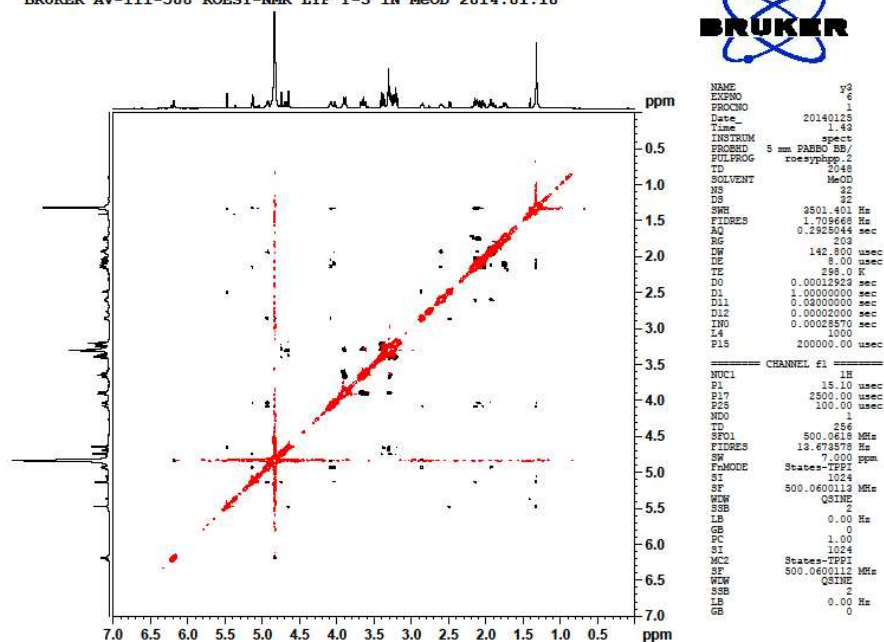

S6

## 70. ROESY Spectrum of compound 8

MS Formula Results: + Scan (4.061 min) Sub (2014090503.d)

| m/z     | Ion                 | Formula        | Abundance      |       |             |          |            |           |            |                |            |             |               |     |
|---------|---------------------|----------------|----------------|-------|-------------|----------|------------|-----------|------------|----------------|------------|-------------|---------------|-----|
| 718.275 | [M+Na] <sup>+</sup> | C36 H48 Na O18 | 902310.8       |       |             |          |            |           |            |                |            |             |               |     |
| 1       | Best                | Formula (M)    | Ion Formula    | Score | Cross Score | Mass     | Calc. Mass | Calc. m/z | Diff (ppm) | Abs Diff (ppm) | Mass Match | Abund Match | Spacing Match | DGE |
|         | ✓                   | C36 H48 O18    | C36 H48 Na O18 | 99.85 |             | 696.2858 | 696.2841   | 718.2733  | -2.47      | 2.47           | 99.85      | 99.94       | 99.85         | 7   |
|         | □                   | C38 H44 Na O12 | C38 H44 Na O12 | 98.50 |             | 696.2858 | 696.2894   | 718.2755  | 5.22       | 5.22           | 99.09      | 97.88       | 99.85         | 16  |
|         | □                   | C43 H49 Na O7  | C43 H48 Na O7  | 97.4  |             | 696.2858 | 696.2838   | 718.2728  | -3.21      | 3.21           | 99.65      | 91.84       | 99.82         | 25  |

## S71. HRESIMS Spectrum of compound 8

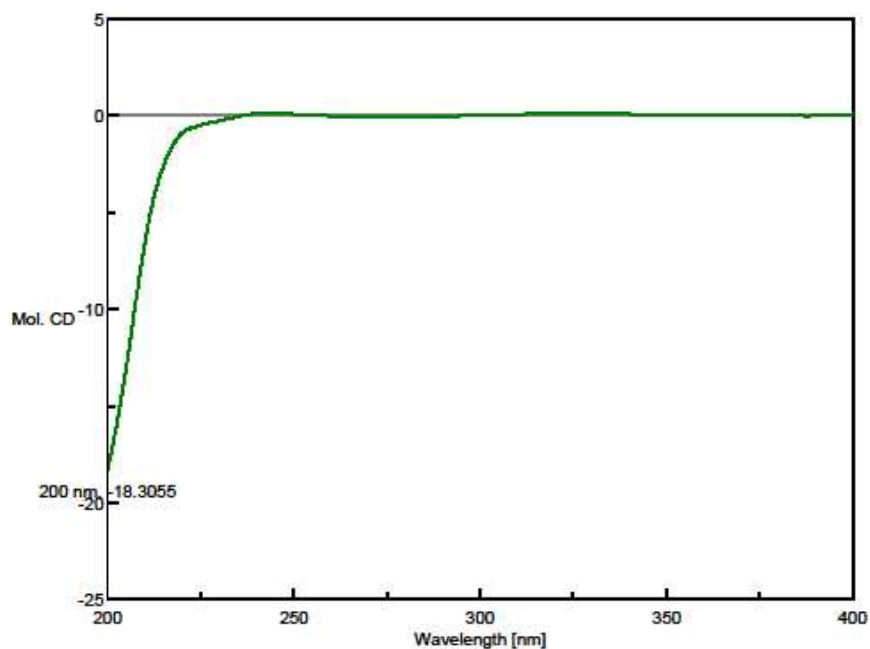

## S72. CD Spectrum of compound 8 (CH<sub>3</sub>OH)

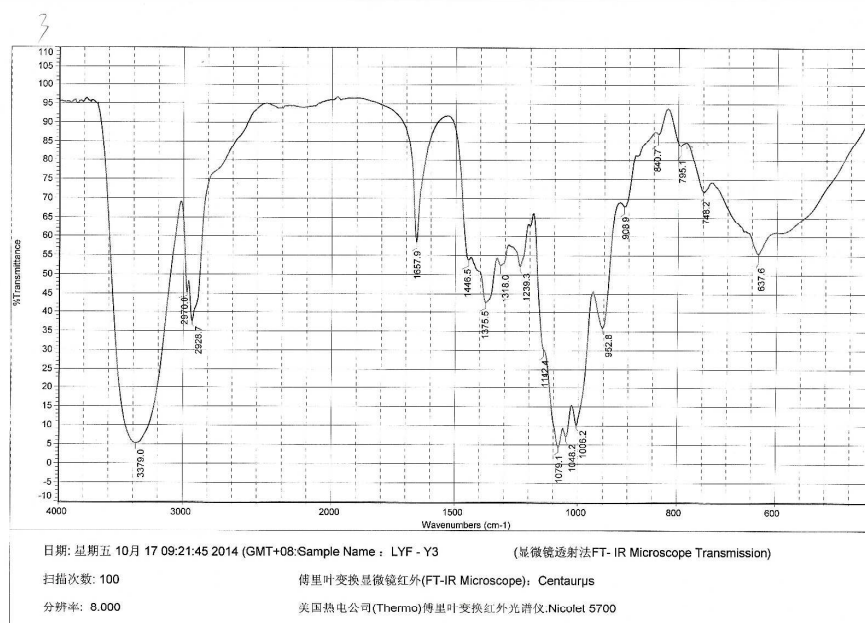

### S73. IR Spectrum of compound 9

BRUKER AV-III-500 1H-NMR LYF Y-2 IN MeOD 2014.01.10

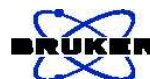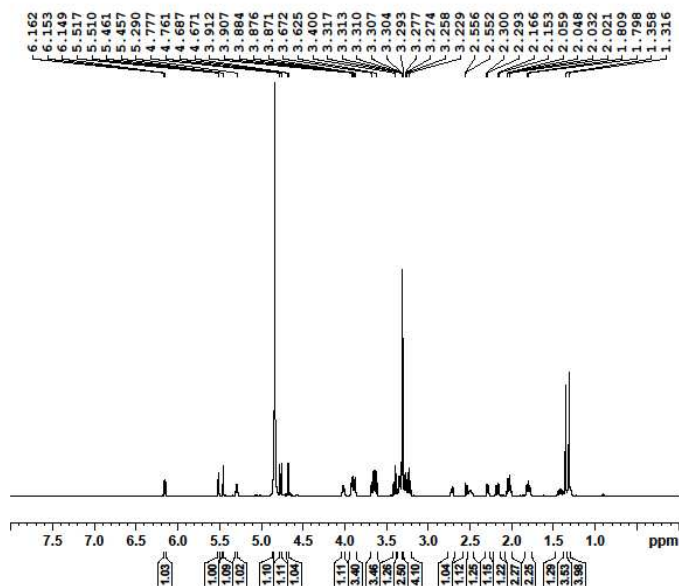

### S74. <sup>1</sup>H NMR Spectrum of compound 9 (500MHz, Methanol-d<sub>4</sub>)

BRUKER AV-III-500 13C-NMR LYF Y-2 IN MeOD 2014.01.10

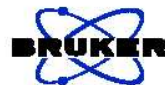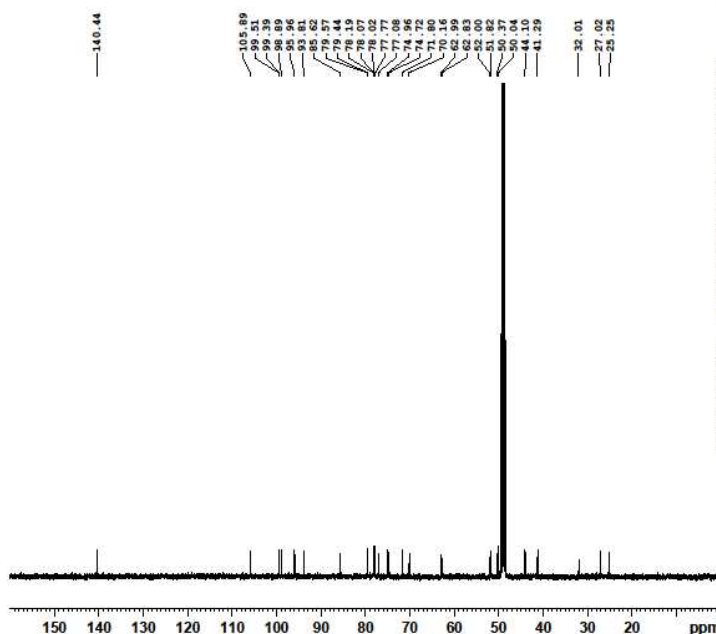

```

NAME          y2
EXPNO         2
PROCNO        1
Date_         20140119
Time          10.57
INSTRUM       spect
PROBHD        5 mm PABBO BB/
PULPROG       zgpg30
TD            65536
SOLVENT       MeOD
NS            1088
DS            4
SWH           29761.904 Hz
FIDRES        0.454131 Hz
AQ            1.1010345 sec
RG            203
DW            16.800 usec
DE            6.50 usec
TE            298.2 K
D1            1.00000000 sec
D11           0.02000000 sec
TDO           400

===== CHANNEL f1 =====
NUC1          13C
P1            10.00 usec
SI            32768
SF            125.7400118 MHz
WDW           EM
SSB           0
LB            1.00 Hz
GB            0
PC            1.40
  
```

S75.  $^{13}\text{C}$  NMR Spectrum of compound **9** (125 MHz, Methanol- $d_4$ )

BRUKER AV-III-500 COSY-NMR LYF Y-2 IN MeOD 2014.01.10

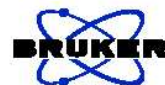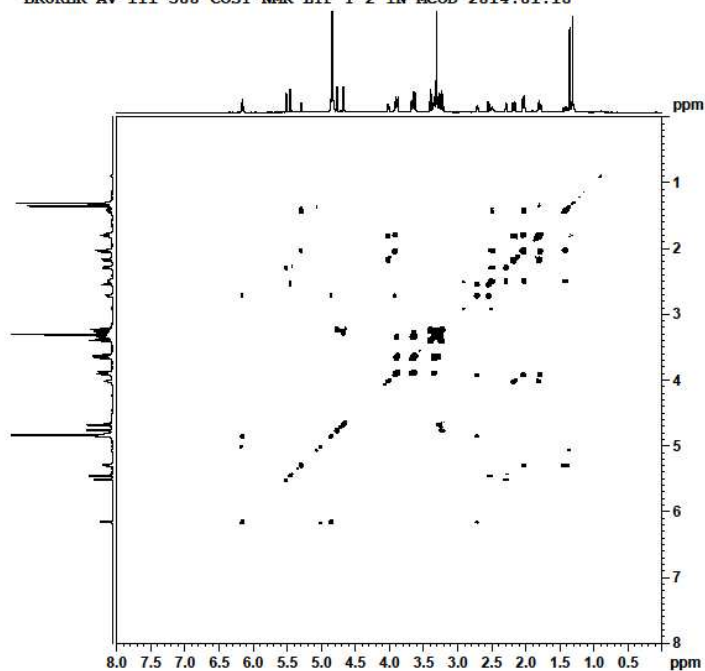

```

NAME          y2
EXPNO         3
PROCNO        1
Date_         20140123
Time          22.10
INSTRUM       spect
PROBHD        5 mm PABBO BB/
PULPROG       cosygpgf
TD            2048
SOLVENT       MeOD
NS            1
DS            8
SWH           3501.401 Hz
FIDRES        1.709668 Hz
AQ            0.2925044 sec
RG            203
DW            142.800 usec
DE            6.00 usec
TE            297.8 K
D0            0.00000305 sec
D1            1.00000000 sec
D12           0.00000480 sec
D16           0.00020000 sec
IN0           0.00028570 sec

===== CHANNEL f1 =====
NUC1          1H
P1            15.10 usec
WDW           1
SF01          500.0618 MHz
FIDRES        12.472356 Hz
SW            7.000 ppm
F0MODE        QF
SI            1024
SF            500.0600123 MHz
WDW           SINE
SSB           0
LB            0.00 Hz
GB            0
PC            1.40
SI            1024
MC2           QF
SF            500.0600115 MHz
WDW           SINE
SSB           0
LB            0.00 Hz
GB            0
  
```

S76.  $^1\text{H}$ - $^1\text{H}$  COSY Spectrum of compound **9**

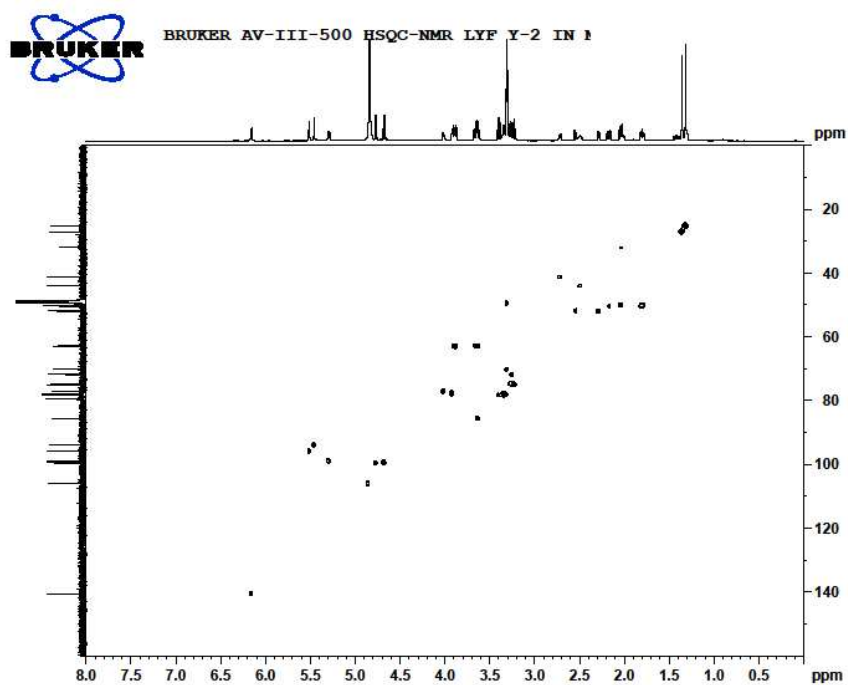

S77. HSQC Spectrum of compound **9**

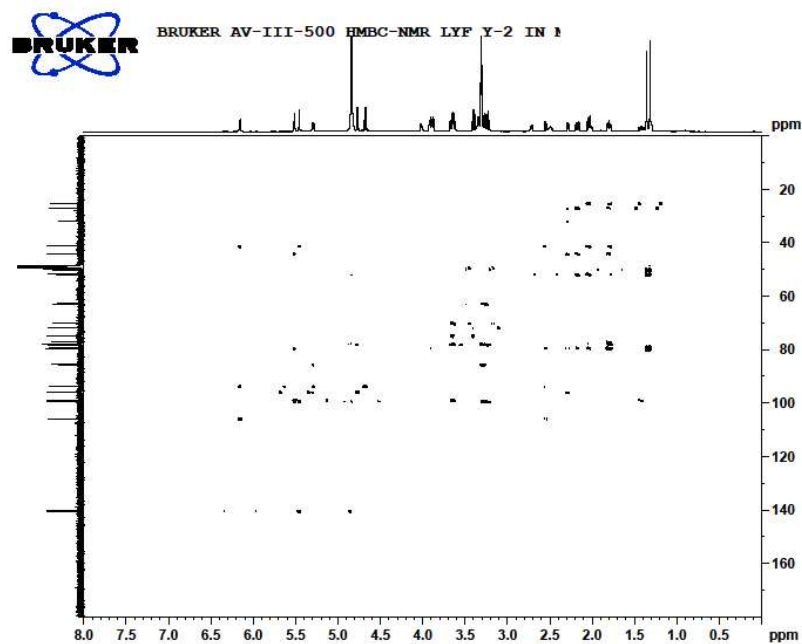

S78. HMBC Spectrum of compound **9**

BRUKER AV-III-500 ROESY-NMR LYF Y-2 IN MeOD 2014.01.10

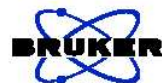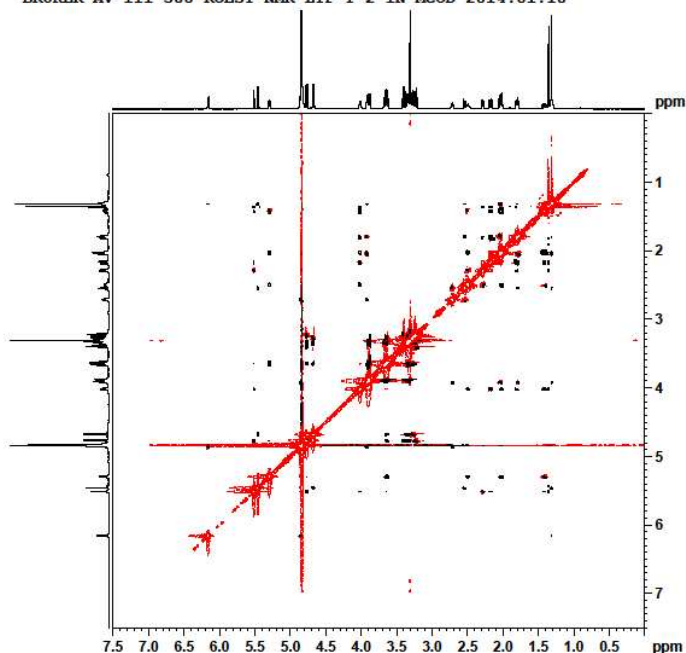

```

NAME      y2
EXPNO     6
PROCNO    1
Date_     20140114
Time      1.57
INSTRUM   spect
PROBHD    5 mm QNP1H/
PULPROG   roesyphpp.2
TD         2048
SOLVENT   MeOD
NS         32
DS         32
SWH        3501.401 Hz
FIDRES     1.709668 Hz
AQ         0.1925044 sec
RG         303
DW         142.800 usec
DE         8.00 usec
TE         298.0 K
D0         0.00012923 sec
D1         1.00000000 sec
D11        0.03000000 sec
D12        0.00002000 sec
JWD        0.00028570 sec
L4         1000
P15        200000.00 usec

===== CHANNEL f1 =====
NUC1       1H
P1         15.10 usec
P17        2500.00 usec
P18        100.00 usec
NUC2       1
TD         256
SF01       500.0618 MHz
FIDRES     13.478378 Hz
SW         7.000 ppm
PQMODE     States-TPPI
SI         1024
SF         500.0600130 MHz
WQW        QSIGN
SSB        2
LB         0.00 Hz
GB         0
PC         1.00
SI         1024
MC2        States-TPPI
SF         500.0600137 MHz
WQW        QSIGN
SSB        2
LB         0.00 Hz
GB         0
  
```

S79. ROESY Spectrum of compound **9**

MS Formula Results: + Scan (3.591 min) Sub (2014090502.d)

| m/z      | Ion                 | Formula        | Abundance |
|----------|---------------------|----------------|-----------|
| 719.2741 | (M+Na) <sup>+</sup> | C30 H48 Na O18 | 379871.4  |

| Base | Formula (M) | Ion Formula    | Score | Cross Score | Mass     | Calc Mass | Calc m/z | Diff (ppm) | Abs Off (ppm) | Mass Match | Abund Match | Spacing Match | DBE |
|------|-------------|----------------|-------|-------------|----------|-----------|----------|------------|---------------|------------|-------------|---------------|-----|
| ✓    | C30 H48 O18 | C30 H48 Na O18 | 99.92 |             | 696.2645 | 696.2641  | 719.2733 | -1.11      | 1.11          | 99.96      | 99.97       | 99.77         |     |

S80. HRESIMS Spectrum of compound **9**

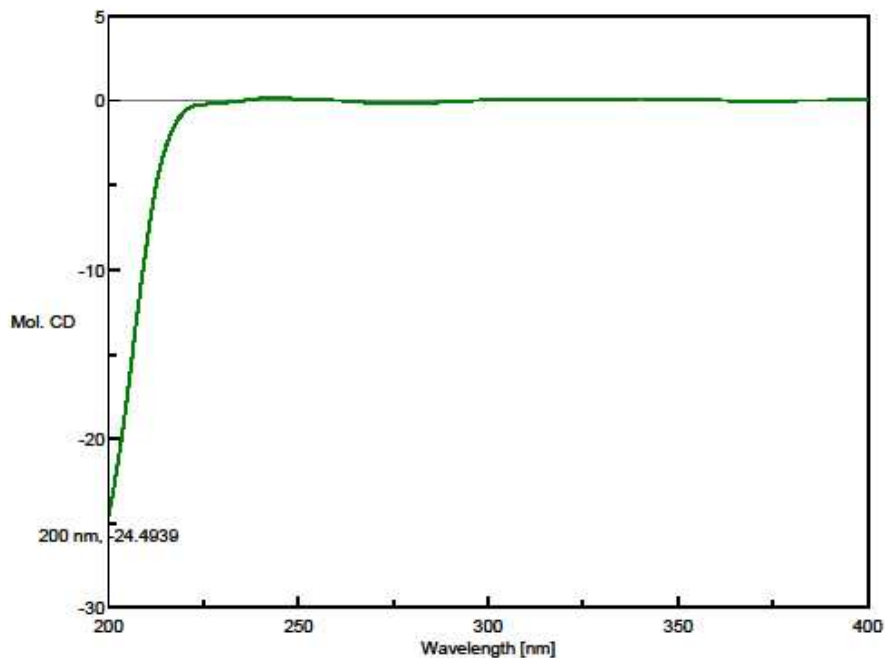

S81. CD Spectrum of compound **9** (CH<sub>3</sub>OH)
